# Supplementary material
Source: publisher site journal article supplement (https://www.spandidos-publications.com/7831/downloadSupplementary)
Supplement: Supplementary file 1 [file downloadSupplementary]

## Sheet: Sheet1
Table SII. Mendelian randomization analysis of 342 gene-outcome causal relationships in the training set of pQTL.
SNP	chr	pos	effect_allele	other_allele	beta	se	pval	Symbol
rs79598313	1	26958422	T	C	0.117537	0.0231604	3.88e-07	A1BG
rs661955	1	234707109	C	G	0.0424582	0.00712537	2.54e-09	A1BG
rs2723889	12	103606692	C	T	0.0529509	0.00747828	1.44e-12	A1BG
rs3751198	12	103753429	G	A	0.0459304	0.00724038	2.24e-10	A1BG
rs117257001	14	49271059	A	G	0.210254	0.0426089	8.04e-07	A1BG
rs58231973	14	58330929	A	G	-0.0444604	0.00708806	3.55e-10	A1BG
rs34042070	16	72067626	G	C	0.0445673	0.00908056	9.2e-07	A1BG
rs435442	19	58296461	A	G	0.303837	0.0252287	2.1e-33	A1BG
rs1265957	19	58347310	G	A	0.297273	0.0166904	5.8e-71	A1BG
rs1260326	2	27508073	C	T	-0.136559	0.0072115	5.74e-80	A1BG
rs3755161	2	169018732	G	A	-0.112323	0.0187661	2.16e-09	A1BG
rs17803745	20	39913927	T	C	-0.0369724	0.00739946	5.83e-07	A1BG
rs6029549	20	41126055	G	C	0.0345385	0.00699634	7.95e-07	A1BG
rs11719450	3	58471084	T	C	0.0399102	0.00730378	4.65e-08	A1BG
rs9271458	6	32620676	A	C	0.0433912	0.00789968	3.96e-08	A1BG
rs35332062	7	73597712	A	G	-0.124821	0.01056	3.07e-32	A1BG
rs13230583	7	150620190	C	T	-0.054453	0.00864482	3e-10	A1BG
rs2393967	10	63373396	C	A	0.0414474	0.00732741	1.55e-08	AAMDC
rs72882962	11	269129	T	C	0.0450887	0.00889387	3.99e-07	AAMDC
rs79453342	11	77527049	A	C	-0.987595	0.0362169	9.91e-164	AAMDC
rs150596840	11	77571106	T	C	0.151645	0.0296218	3.07e-07	AAMDC
rs117484451	11	77588765	A	G	-1.07934	0.0315827	1e-200	AAMDC
rs79950774	11	77616323	T	A	0.16695	0.0161676	5.36e-25	AAMDC
rs145404061	11	78028994	C	G	0.187935	0.0381238	8.24e-07	AAMDC
rs17825668	11	78104013	G	A	0.14366	0.0202172	1.2e-12	AAMDC
rs112083647	11	78481813	A	T	-0.294208	0.0343515	1.08e-17	AAMDC
rs11237574	11	78644167	A	G	0.120574	0.0222689	6.15e-08	AAMDC
rs10876550	12	54318524	A	G	0.0403534	0.00682255	3.32e-09	AAMDC
rs75425120	13	82721996	C	A	-0.139208	0.0259082	7.74e-08	AAMDC
rs1613662	19	55025227	A	G	0.0480811	0.00915337	1.5e-07	AAMDC
rs1260326	2	27508073	C	T	-0.0392904	0.0069429	1.52e-08	AAMDC
rs187100951	2	77089811	C	G	0.168818	0.0337371	5.62e-07	AAMDC
rs1354034	3	56815721	C	T	0.0545279	0.00689899	2.71e-15	AAMDC
rs13111508	4	169725817	C	T	-0.0373028	0.00762359	9.93e-07	AAMDC
rs6866614	5	132451445	G	A	0.0348517	0.00693849	5.09e-07	AAMDC
rs915652	6	31781365	A	G	-0.0617563	0.0100729	8.74e-10	AAMDC
rs7843996	8	74584614	G	A	-0.0366297	0.00742209	8.01e-07	AAMDC
rs4736268	8	138863131	T	C	0.0418765	0.00796989	1.49e-07	AAMDC
rs692502	9	4745645	A	G	0.0367872	0.0068947	9.52e-08	AAMDC
rs12133869	1	245952850	C	T	0.0475919	0.00967911	8.79e-07	AARSD1
rs76113359	12	23547383	T	A	0.0438313	0.00892708	9.11e-07	AARSD1
rs11170874	12	54332691	G	A	0.0527944	0.00774688	9.43e-12	AARSD1
rs4766578	12	111466567	A	T	-0.0468421	0.00716717	6.33e-11	AARSD1
rs4907596	13	113204475	T	C	0.0379258	0.00770501	8.56e-07	AARSD1
rs323500	17	42988528	T	C	0.131661	0.00797006	2.66e-61	AARSD1
rs1354034	3	56815721	C	T	0.0667301	0.00732414	8.16e-20	AARSD1
rs342293	7	106731773	G	C	-0.0382327	0.00719671	1.08e-07	AARSD1
rs16872634	8	105278985	C	T	-0.042942	0.00804584	9.44e-08	AARSD1
rs77923270	1	37318335	T	G	-0.13485	0.0274506	8.99e-07	ABCA2
rs332152	10	28585602	A	G	-0.0510611	0.00959151	1.02e-07	ABCA2
rs61858525	10	87367307	T	C	0.046049	0.00899989	3.11e-07	ABCA2
rs144932926	11	1764171	C	T	-0.0727013	0.0135226	7.6e-08	ABCA2
rs12980358	19	8661298	A	G	-0.10975	0.0223566	9.15e-07	ABCA2
rs11736618	4	53955400	C	T	0.0376711	0.00766536	8.9e-07	ABCA2
rs7437055	4	100995253	A	G	-0.0696191	0.0131965	1.32e-07	ABCA2
rs146141982	7	542530	G	C	0.105746	0.0215008	8.73e-07	ABCA2
rs7080386	10	63288546	A	C	0.0582995	0.00752464	9.35e-15	ABHD14B
rs10876550	12	54318524	A	G	0.045219	0.00745031	1.28e-09	ABHD14B
rs62045220	15	55975172	T	C	0.0799026	0.016011	6.02e-07	ABHD14B
rs116354263	18	57633880	G	A	-0.0612825	0.0112599	5.25e-08	ABHD14B
rs892090	19	55027704	G	T	0.0577225	0.00998009	7.3e-09	ABHD14B
rs13060579	3	46146778	T	C	-0.130714	0.0222214	4.04e-09	ABHD14B
rs113284266	3	51096877	T	C	-0.41661	0.0318264	3.75e-39	ABHD14B
rs190682742	3	52052996	T	C	-1.23987	0.0362523	1e-200	ABHD14B
rs79736866	5	145301087	C	T	-0.161516	0.0324162	6.27e-07	ABHD14B
rs1424862	8	71690441	A	G	0.0929669	0.0187252	6.88e-07	ABHD14B
rs6993770	8	105569300	T	A	-0.0585159	0.00817698	8.3e-13	ABHD14B
rs692503	9	4745675	A	G	0.0463273	0.00752132	7.3e-10	ABHD14B
rs7080386	10	63288546	A	C	0.0449415	0.00757702	3.01e-09	ABL1
rs11603524	11	268628	A	G	0.0559749	0.00869749	1.23e-10	ABL1
rs964184	11	116778201	C	G	-0.0647132	0.0109635	3.58e-09	ABL1
rs10876550	12	54318524	A	G	0.0385863	0.00749394	2.62e-07	ABL1
rs150455448	16	59460132	C	T	0.22303	0.0425462	1.59e-07	ABL1
rs3786448	18	3745759	G	A	0.0406054	0.00816552	6.6e-07	ABL1
rs1354034	3	56815721	C	T	0.0819028	0.00758509	3.52e-27	ABL1
rs12187267	5	16490943	G	A	-0.0404102	0.00783172	2.47e-07	ABL1
rs6866614	5	132451445	G	A	0.0438276	0.00762614	9.08e-09	ABL1
rs342298	7	106733200	T	C	-0.0410293	0.00747025	3.97e-08	ABL1
rs6993770	8	105569300	T	A	-0.0452827	0.00823223	3.78e-08	ABL1
rs4742045	9	4746363	G	T	-0.0374903	0.00759573	7.99e-07	ABL1
rs2229067	9	130885205	T	C	-0.177497	0.0316278	2e-08	ABL1
rs17855739	19	5831829	T	C	0.0874695	0.0122817	1.06e-12	ABO
rs9405864	6	5708332	A	T	-0.0299118	0.00504929	3.14e-09	ABO
rs7033492	9	133165599	C	T	0.249542	0.00793427	1e-200	ABO
rs56302081	9	133193023	T	C	-0.303336	0.00763755	1e-200	ABO
rs176694	9	133289021	G	T	0.5545	0.0128822	1e-200	ABO
rs117537850	9	133390145	C	T	0.816979	0.028197	1.4e-184	ABO
rs149821214	9	133517420	T	C	0.778758	0.0555614	1.24e-44	ABO
rs150660500	9	133667291	A	G	0.149859	0.023041	7.82e-11	ABO
rs138975343	1	158802189	A	C	-0.198075	0.0400635	7.65e-07	ABRAXAS2
rs1172112	1	205263686	A	G	0.0558533	0.0113484	8.58e-07	ABRAXAS2
rs10733789	10	63188924	C	T	0.0451265	0.00824898	4.49e-08	ABRAXAS2
rs10774624	12	111395984	A	G	-0.0406486	0.00764462	1.05e-07	ABRAXAS2
rs12599491	16	59645486	C	T	-0.041366	0.00781757	1.21e-07	ABRAXAS2
rs4595972	2	16793055	A	C	-0.0378372	0.00769971	8.92e-07	ABRAXAS2
rs1354034	3	56815721	C	T	0.0504447	0.00774662	7.42e-11	ABRAXAS2
rs11242109	5	132341354	T	G	-0.048907	0.00764043	1.54e-10	ABRAXAS2
rs342293	7	106731773	G	C	-0.048294	0.00761481	2.27e-10	ABRAXAS2
rs409801	9	4744743	C	T	0.0457372	0.007612	1.87e-09	ABRAXAS2
rs150705707	1	94507142	G	T	0.0471597	0.00770524	9.33e-10	ACAA1
rs1726364	12	124732334	C	A	-0.0387344	0.00774153	5.63e-07	ACAA1
rs9913936	17	72078007	C	T	0.0445414	0.00818752	5.32e-08	ACAA1
rs4503880	18	58416822	C	T	-0.0767896	0.0095243	7.47e-16	ACAA1
rs7247711	19	34912304	A	G	0.162975	0.0304406	8.61e-08	ACAA1
rs1260326	2	27508073	C	T	-0.0488979	0.0078058	3.74e-10	ACAA1
rs4132722	2	186785966	T	C	-0.0390097	0.00771841	4.32e-07	ACAA1
rs156265	3	38129319	G	C	-0.125267	0.0108057	4.49e-31	ACAA1
rs76649293	3	38169303	G	T	-0.157208	0.0165343	1.94e-21	ACAA1
rs4835265	4	145900258	A	C	0.0845101	0.010489	7.82e-16	ACAA1
rs61797339	1	75724261	T	G	0.142001	0.00828067	6.45e-66	ACADM
rs57137189	12	90378312	T	C	0.179175	0.0360992	6.93e-07	ACADM
rs1172112	1	205263686	A	G	0.0594692	0.0111872	1.06e-07	ACADSB
rs7896518	10	63344740	G	A	0.0520122	0.0077102	1.52e-11	ACADSB
rs112992830	10	123002474	T	C	-0.185144	0.034154	5.93e-08	ACADSB
rs7913063	10	123039167	T	A	0.37434	0.0135833	3.47e-167	ACADSB
rs7894710	10	123083948	A	C	-0.15593	0.0121324	8.34e-38	ACADSB
rs35277580	12	6185368	A	G	-0.0476292	0.00751086	2.28e-10	ACADSB
rs892090	19	55027704	G	T	0.0534098	0.0101139	1.29e-07	ACADSB
rs1260326	2	27508073	C	T	-0.042332	0.00766623	3.35e-08	ACADSB
rs1354034	3	56815721	C	T	0.0592112	0.00761197	7.33e-15	ACADSB
rs11242109	5	132341354	T	G	-0.0970778	0.00750836	3.08e-38	ACADSB
rs342293	7	106731773	G	C	-0.0591971	0.00748575	2.62e-15	ACADSB
rs6993770	8	105569300	T	A	-0.0900477	0.00826653	1.24e-27	ACADSB
rs138789761	9	25123254	C	T	-0.192051	0.0389667	8.28e-07	ACADSB
rs1337526	1	47499458	G	A	0.0611479	0.00880021	3.69e-12	ACAN
rs333947	1	109928142	A	G	-0.0524241	0.00982295	9.46e-08	ACAN
rs61802301	1	161605359	C	T	0.0357502	0.00722359	7.46e-07	ACAN
rs56278466	10	17833858	G	T	0.0643076	0.00744741	5.88e-18	ACAN
rs9415676	10	63250866	G	A	-0.0433341	0.00727853	2.62e-09	ACAN
rs11000138	10	72022264	T	A	-0.19559	0.00725547	4.65e-160	ACAN
rs2672591	10	122474768	T	A	0.0370823	0.00711924	1.9e-07	ACAN
rs2121438	11	3186871	T	C	0.04025	0.00797353	4.47e-07	ACAN
rs55821102	11	11422781	A	G	0.153555	0.0290296	1.23e-07	ACAN
rs1487719	11	45143336	A	G	-0.0684949	0.0114626	2.29e-09	ACAN
rs895734	11	45662704	T	C	0.0904092	0.00712821	7.32e-37	ACAN
rs71475909	11	47355732	G	A	0.0503096	0.00739912	1.05e-11	ACAN
rs7947357	11	57646914	G	A	-0.0347034	0.00706813	9.12e-07	ACAN
rs59379014	11	126358105	T	C	0.10235	0.0135693	4.6e-14	ACAN
rs35042370	12	89262711	T	C	0.0771365	0.0155801	7.39e-07	ACAN
rs3764002	12	108224853	T	C	-0.0470516	0.00790338	2.63e-09	ACAN
rs12438326	15	50745777	G	A	0.0429407	0.00740389	6.64e-09	ACAN
rs142050326	15	88848471	T	C	-0.182576	0.0282461	1.02e-10	ACAN
rs74029051	15	88896331	T	A	0.0563237	0.011307	6.32e-07	ACAN
rs377432141	15	88905952	T	C	-0.33223	0.0478669	3.9e-12	ACAN
rs7200005	16	69895234	A	G	-0.0353888	0.0070537	5.25e-07	ACAN
rs148442341	17	1687083	T	C	0.0518753	0.00994963	1.85e-07	ACAN
rs2905880	17	31219157	C	T	-0.0445637	0.0075869	4.26e-09	ACAN
rs2150879	17	59781849	A	G	0.0448541	0.00699902	1.47e-10	ACAN
rs9891614	17	78363969	A	G	0.0381127	0.00774043	8.49e-07	ACAN
rs55639531	18	394341	G	C	0.0747475	0.00776956	6.55e-22	ACAN
rs17549173	19	35909329	A	G	0.108229	0.013685	2.6e-15	ACAN
rs7260605	19	41441730	T	C	-0.0347995	0.00701034	6.9e-07	ACAN
rs10929979	2	160358346	A	G	-0.0382857	0.0077082	6.8e-07	ACAN
rs134089	22	27672324	G	A	0.0417659	0.00709038	3.85e-09	ACAN
rs6006754	22	45453927	A	G	0.0489273	0.00872956	2.09e-08	ACAN
rs1560333	3	53104238	C	T	-0.061739	0.0113224	4.96e-08	ACAN
rs828602	3	98754474	A	G	0.0701727	0.0071283	7.26e-23	ACAN
rs12330321	3	99072204	A	G	-0.0685818	0.0102659	2.38e-11	ACAN
rs9758071	3	119242742	A	G	-0.0515659	0.00788978	6.33e-11	ACAN
rs1813006	4	102080492	T	G	-0.0913889	0.0150932	1.4e-09	ACAN
rs77921397	5	176840686	A	C	-0.128531	0.0247008	1.96e-07	ACAN
rs71549220	6	32530140	A	C	0.0752129	0.0129745	6.75e-09	ACAN
rs5010183	7	7246567	T	C	-0.0397891	0.00731673	5.39e-08	ACAN
rs6461354	7	17874977	T	C	-0.0504721	0.00716337	1.84e-12	ACAN
rs10956487	8	129705470	G	A	-0.0437131	0.00827798	1.29e-07	ACAN
rs459164	9	19207143	G	A	-0.0384946	0.00772382	6.23e-07	ACAN
rs12684083	9	76533675	A	G	-0.1055	0.00822866	1.25e-37	ACAN
rs34434834	11	126437901	A	G	0.169002	0.0200052	2.97e-17	ACE
rs75168245	17	63297353	A	G	-0.14033	0.0178217	3.43e-15	ACE
rs6504163	17	63468418	T	C	-0.359973	0.00782152	1e-200	ACE
rs67817520	17	63631768	T	C	0.153392	0.0108843	4.2e-45	ACE
rs145898451	17	63823517	T	C	-0.261688	0.0377755	4.28e-12	ACE
rs9890187	17	64265940	G	A	0.0939485	0.0103841	1.47e-19	ACE
rs6135362	20	15191192	C	T	-0.0439576	0.00863341	3.55e-07	ACE
rs115478735	9	133274295	T	A	-0.265011	0.00935096	1.1e-176	ACE
rs41307428	9	133471682	T	C	0.181742	0.0283275	1.4e-10	ACE
rs924204	1	16187431	G	A	0.0399763	0.00688631	6.43e-09	ACE2
rs79598313	1	26958422	T	C	-0.110013	0.0223972	9.02e-07	ACE2
rs7543296	1	100882544	A	C	0.0366334	0.00710685	2.54e-07	ACE2
rs267733	1	150986360	G	A	-0.0531496	0.0093142	1.15e-08	ACE2
rs151068477	10	50882756	T	G	0.196974	0.0397327	7.14e-07	ACE2
rs12417334	11	12050552	G	A	-0.038375	0.00728577	1.39e-07	ACE2
rs4084164	11	62433986	G	A	-0.046185	0.00705765	5.99e-11	ACE2
rs35221426	12	20841602	T	G	0.0631062	0.00959647	4.83e-11	ACE2
rs72694393	14	24404987	T	G	0.0595857	0.00681258	2.2e-18	ACE2
rs28929474	14	94378610	T	C	0.219282	0.0237701	2.83e-20	ACE2
rs55707100	15	43528519	T	C	0.113213	0.0220163	2.71e-07	ACE2
rs340005	15	60585831	A	G	0.0467583	0.00697888	2.08e-11	ACE2
rs57909886	15	73681321	C	T	0.0454518	0.00678987	2.17e-11	ACE2
rs728538	16	51171908	G	T	0.0478689	0.00907444	1.33e-07	ACE2
rs72787359	16	51397319	C	A	-0.0958075	0.013144	3.12e-13	ACE2
rs56011703	17	75761755	T	C	0.0494243	0.00991776	6.25e-07	ACE2
rs4940697	18	58441253	A	G	-0.0376636	0.00769205	9.76e-07	ACE2
rs55901327	19	24004075	A	G	-0.0470566	0.00927953	3.96e-07	ACE2
rs485186	19	48703949	G	A	0.0348649	0.00682429	3.24e-07	ACE2
rs11127048	2	27529596	A	G	-0.0349767	0.00710811	8.62e-07	ACE2
rs4853563	2	191254808	A	G	-0.042901	0.00728546	3.9e-09	ACE2
rs1047891	2	210675783	A	C	0.0524081	0.00734238	9.49e-13	ACE2
rs1800961	20	44413724	T	C	0.0993405	0.0190649	1.88e-07	ACE2
rs35598889	22	17968028	C	T	-0.05482	0.00808221	1.18e-11	ACE2
rs925649	3	37229373	T	C	-0.0352824	0.00691438	3.35e-07	ACE2
rs7621237	3	79687165	C	T	-0.0335519	0.00684893	9.64e-07	ACE2
rs12500824	4	76495474	G	A	-0.0426608	0.00706219	1.53e-09	ACE2
rs870992	5	52897406	G	A	0.0634404	0.0124281	3.31e-07	ACE2
rs72778231	5	78304225	G	A	0.125952	0.0256458	9.05e-07	ACE2
rs7450517	6	54038045	A	G	-0.0413774	0.00738126	2.07e-08	ACE2
rs1692814	8	11846789	C	T	0.0387653	0.00777032	6.07e-07	ACE2
rs112875651	8	125494452	A	G	-0.0780461	0.00703487	1.34e-28	ACE2
rs13284665	9	128751091	G	A	-0.0516635	0.00997789	2.25e-07	ACE2
rs909832	1	25427534	G	C	0.0348452	0.00701035	6.68e-07	ACHE
rs333947	1	109928142	A	G	-0.0576127	0.0097619	3.6e-09	ACHE
rs7554873	1	161642443	C	T	0.0785326	0.016019	9.46e-07	ACHE
rs2269615	1	172446311	T	C	-0.0695803	0.00700849	3.15e-23	ACHE
rs28456	11	61822009	G	A	0.0485623	0.00747238	8.09e-11	ACHE
rs10876863	12	55960488	C	G	0.0379384	0.00727915	1.87e-07	ACHE
rs1862862	16	4205353	G	C	0.0381268	0.00701002	5.36e-08	ACHE
rs12945299	17	7176750	G	A	0.0445152	0.00871123	3.22e-07	ACHE
rs689057	18	11887885	C	T	-0.04791	0.00804469	2.59e-09	ACHE
rs12617993	2	77157564	G	A	0.0389019	0.00764477	3.61e-07	ACHE
rs1153286	21	29312062	C	T	0.0358812	0.00712395	4.74e-07	ACHE
rs3747207	22	43928975	A	G	0.0528377	0.00844499	3.93e-10	ACHE
rs7636227	3	52532666	A	G	0.0508627	0.00702107	4.35e-13	ACHE
rs9289449	3	133564395	A	G	-0.0388048	0.00711373	4.9e-08	ACHE
rs12053876	3	165832595	A	G	-0.0478343	0.00897837	9.95e-08	ACHE
rs35762167	3	186937196	C	T	-0.106853	0.00709775	3.22e-51	ACHE
rs3909471	5	39431834	A	G	-0.0431764	0.00835039	2.33e-07	ACHE
rs6924352	6	32238422	T	G	0.047083	0.00861614	4.64e-08	ACHE
rs138008815	7	99606599	C	G	-0.136533	0.0277269	8.47e-07	ACHE
rs11773620	7	100535643	A	C	-0.161292	0.0118347	2.7e-42	ACHE
rs62483660	7	100934036	C	T	0.253258	0.0119894	4.83e-99	ACHE
rs2074683	7	101160333	T	C	0.0471026	0.00736144	1.57e-10	ACHE
rs401153	8	17890208	G	A	0.0387483	0.00771945	5.18e-07	ACHE
rs4737010	8	41772929	A	G	-0.0438531	0.00834023	1.46e-07	ACHE
rs2721948	8	115631111	T	C	0.0381887	0.0071371	8.76e-08	ACHE
rs117210485	9	133523026	A	G	0.155129	0.0292156	1.1e-07	ACHE
rs72676413	1	42306039	A	T	0.31592	0.0570884	3.13e-08	ACOT13
rs3820337	1	205045802	C	T	0.054932	0.0108603	4.24e-07	ACOT13
rs10822145	10	63174788	T	C	0.0568202	0.0075581	5.57e-14	ACOT13
rs1362213	12	6173262	T	C	-0.0422056	0.00769255	4.1e-08	ACOT13
rs6580981	12	54329244	A	G	0.056043	0.00763881	2.19e-13	ACOT13
rs10774624	12	111395984	A	G	-0.0429208	0.00759742	1.61e-08	ACOT13
rs72759222	15	96966887	G	A	-0.0612242	0.0121655	4.84e-07	ACOT13
rs892090	19	55027704	G	T	0.0612813	0.010213	1.97e-09	ACOT13
rs115484459	2	195916010	A	G	-0.143447	0.028772	6.18e-07	ACOT13
rs1354034	3	56815721	C	T	0.0681659	0.00768978	7.69e-19	ACOT13
rs1530455	3	123136052	C	T	-0.0403046	0.00783043	2.64e-07	ACOT13
rs10058074	5	132350453	A	G	-0.05586	0.00757545	1.66e-13	ACOT13
rs112955416	6	24497964	T	C	-0.144265	0.0284964	4.14e-07	ACOT13
rs148716963	6	24549499	C	T	0.186243	0.0349767	1.01e-07	ACOT13
rs9358791	6	24675404	A	T	0.0675648	0.00892358	3.69e-14	ACOT13
rs117586129	6	93039085	T	C	-0.227693	0.0464008	9.24e-07	ACOT13
rs6993770	8	105569300	T	A	-0.0720106	0.00834054	5.93e-18	ACOT13
rs55646585	8	143925453	T	C	0.0390087	0.0076476	3.38e-07	ACOT13
rs7080386	10	63288546	A	C	0.0453277	0.00774118	4.76e-09	ACOX1
rs11644190	16	86907115	T	C	-0.197426	0.0370576	9.95e-08	ACOX1
rs10852766	17	75955783	C	T	0.0776409	0.00808345	7.62e-22	ACOX1
rs1354034	3	56815721	C	T	0.0392954	0.00774814	3.94e-07	ACOX1
rs7829208	8	103168980	T	A	0.042933	0.00844305	3.68e-07	ACOX1
rs6993770	8	105569300	T	A	-0.0472888	0.00841495	1.91e-08	ACOX1
rs35891501	9	4766431	T	C	0.0477247	0.00933958	3.22e-07	ACOX1
rs7175881	15	57751971	A	G	0.227977	0.0461405	7.78e-07	ACP1
rs6548219	2	30762	G	A	0.292807	0.00801688	1e-200	ACP1
rs2941874	2	333665	T	G	0.0629696	0.00760235	1.2e-16	ACP1
rs35284269	2	362911	T	C	0.182915	0.0253102	4.94e-13	ACP1
rs77662658	2	371636	G	T	-0.12578	0.0226226	2.7e-08	ACP1
rs2229498	10	69097096	A	G	-0.0590802	0.0091848	1.26e-10	ACP5
rs6480781	10	75380949	T	G	0.0436944	0.00697028	3.64e-10	ACP5
rs11599750	10	100045685	T	C	0.0461809	0.00691836	2.47e-11	ACP5
rs2559508	10	124863792	A	G	0.0389735	0.00747227	1.83e-07	ACP5
rs61897427	11	47396498	T	G	0.114466	0.021658	1.26e-07	ACP5
rs2293576	11	47413435	A	G	-0.0362961	0.00728695	6.33e-07	ACP5
rs61912563	11	96460822	T	G	0.0473851	0.00948085	5.79e-07	ACP5
rs2072560	11	116791110	C	T	-0.0744134	0.014599	3.45e-07	ACP5
rs35382467	11	128329388	A	G	-0.0933328	0.0114335	3.27e-16	ACP5
rs215225	12	481379	G	A	-0.0364328	0.00689862	1.28e-07	ACP5
rs34095989	12	57233934	A	G	-0.0369242	0.00710254	2.01e-07	ACP5
rs2005918	12	101687198	G	T	0.0527642	0.00700147	4.84e-14	ACP5
rs3751198	12	103753429	G	A	0.0362224	0.00705914	2.88e-07	ACP5
rs2285934	12	112913715	G	T	-0.0353177	0.00716306	8.2e-07	ACP5
rs1958559	14	65585337	T	C	0.0552815	0.00700762	3.05e-15	ACP5
rs2073333	14	94378225	T	C	0.109104	0.00786394	9.1e-44	ACP5
rs4888944	16	79277755	C	A	-0.0454972	0.00803799	1.51e-08	ACP5
rs78755089	16	79542724	T	G	0.108397	0.0123529	1.71e-18	ACP5
rs7406466	17	7138503	A	G	-0.0423167	0.00785163	7.06e-08	ACP5
rs34243815	19	11214289	T	C	0.0845528	0.0138233	9.55e-10	ACP5
rs8112501	19	11543845	C	A	-0.106278	0.0161854	5.16e-11	ACP5
rs74181615	19	11834174	A	T	0.259069	0.0123028	1.94e-98	ACP5
rs143222925	19	12540621	G	A	-0.111875	0.0216912	2.5e-07	ACP5
rs9304577	19	38643918	C	T	-0.0394036	0.00737679	9.21e-08	ACP5
rs3811621	2	189581815	G	C	0.0489068	0.00774768	2.75e-10	ACP5
rs56152551	22	23757077	T	C	-0.0611921	0.0106974	1.06e-08	ACP5
rs3747207	22	43928975	A	G	0.0523991	0.008274	2.4e-10	ACP5
rs12648271	4	55501955	C	G	-0.0417593	0.00766472	5.09e-08	ACP5
rs2625245	4	155590494	G	A	0.0389783	0.00679158	9.51e-09	ACP5
rs9264219	6	31254137	T	C	-0.0406659	0.0074015	3.92e-08	ACP5
rs8192565	6	32223830	T	C	0.0789752	0.0121684	8.57e-11	ACP5
rs3777416	6	159979164	G	A	0.0531202	0.0100677	1.32e-07	ACP5
rs2343596	8	105580979	A	C	-0.0446853	0.00749194	2.45e-09	ACP5
rs10813949	9	33123466	A	G	-0.0568003	0.00739264	1.55e-14	ACP5
rs10981293	9	112169467	T	C	-0.0337918	0.00681686	7.16e-07	ACP5
rs7041446	9	134884208	A	G	-0.0355365	0.00688738	2.47e-07	ACP5
rs77542178	1	119972409	C	T	-0.181315	0.0266631	1.04e-11	ACP6
rs141635047	1	147069764	G	T	-1.41065	0.039779	1e-200	ACP6
rs587713366	1	147407566	G	A	0.29604	0.0283554	1.62e-25	ACP6
rs182489736	1	147470389	C	T	-0.201147	0.0399772	4.87e-07	ACP6
rs140639767	1	147526215	A	C	0.527714	0.0385241	1.04e-42	ACP6
rs11799650	1	147529481	A	G	-0.639089	0.0367513	9.9e-68	ACP6
rs143333817	1	147555803	G	A	-1.41888	0.0361169	1e-200	ACP6
rs74887628	1	147561000	A	G	-0.681417	0.0210779	1e-200	ACP6
rs78082897	1	147587095	T	C	0.386247	0.0221855	6.94e-68	ACP6
rs12059427	1	147600639	A	G	0.497388	0.0326957	2.91e-52	ACP6
rs61754125	1	147620306	A	G	-0.643167	0.0200697	1e-200	ACP6
rs137987097	1	147647455	A	T	-0.699115	0.0360587	9.71e-84	ACP6
rs143830641	1	147652858	A	G	-0.708115	0.0232627	1e-200	ACP6
rs150066520	1	147672895	T	C	-0.690639	0.0255442	5.43e-161	ACP6
rs80139330	1	147687647	A	G	-0.647631	0.0226407	5.86e-180	ACP6
rs144973933	1	147738089	T	C	0.470712	0.0260524	5.7e-73	ACP6
rs58914970	1	147811055	C	T	-0.839568	0.0259092	1e-200	ACP6
rs146788179	1	147841375	T	C	0.274738	0.0239932	2.33e-30	ACP6
rs116509906	1	147851279	A	T	0.343026	0.0204796	5.7e-63	ACP6
rs183686287	1	147864389	A	C	0.52482	0.0610568	8.28e-18	ACP6
rs4630166	1	147864572	C	G	0.32962	0.0288618	3.3e-30	ACP6
rs376203868	1	147873913	C	T	0.298966	0.0216006	1.45e-43	ACP6
rs61747728	1	179557079	T	C	0.125069	0.0197485	2.4e-10	ACP6
rs187386149	17	76129148	A	G	0.0309488	0.00609854	3.88e-07	ACP6
rs12472999	2	103159990	T	C	-0.0253468	0.00510308	6.8e-07	ACP6
rs75166367	2	162107791	A	G	-0.0567176	0.0103172	3.86e-08	ACP6
rs7596846	2	219185805	T	G	-0.0468387	0.00917349	3.29e-07	ACP6
rs34591495	3	48606769	T	C	-0.0354078	0.00694521	3.43e-07	ACP6
rs139746351	5	131133394	A	G	-0.0276488	0.00508508	5.41e-08	ACP6
rs9405469	6	1362000	T	C	0.0339146	0.00671097	4.34e-07	ACP6
rs6965669	7	45391454	C	A	0.028984	0.00580304	5.9e-07	ACP6
rs7004867	8	144059941	T	C	0.04612	0.00912711	4.35e-07	ACP6
rs75833561	1	158800522	C	T	-0.205852	0.0387015	1.04e-07	ACRBP
rs7080386	10	63288546	A	C	0.0718883	0.00763892	4.92e-21	ACRBP
rs10786695	10	102608999	C	A	-0.0376845	0.00756107	6.23e-07	ACRBP
rs78012616	10	126043171	T	C	0.104768	0.0212739	8.45e-07	ACRBP
rs7959658	12	6645025	G	A	0.160696	0.00782974	1.32e-93	ACRBP
rs11170874	12	54332691	G	A	0.0470025	0.00811108	6.84e-09	ACRBP
rs10774624	12	111395984	A	G	-0.0420693	0.00757919	2.85e-08	ACRBP
rs116956460	13	63962746	G	A	-0.203943	0.0392722	2.07e-07	ACRBP
rs231977	16	28530851	C	T	0.0368322	0.00751873	9.65e-07	ACRBP
rs3813145	19	14695350	T	C	0.049406	0.00795906	5.38e-10	ACRBP
rs892090	19	55027704	G	T	0.0691344	0.0101385	9.17e-12	ACRBP
rs1354034	3	56815721	C	T	0.0510327	0.00763333	2.3e-11	ACRBP
rs7682346	4	101900888	G	A	0.0437632	0.00754534	6.63e-09	ACRBP
rs114694170	5	88884379	C	T	0.0864619	0.0159623	6.07e-08	ACRBP
rs6866614	5	132451445	G	A	0.0397178	0.00768119	2.33e-07	ACRBP
rs342298	7	106733200	T	C	-0.0527776	0.00753235	2.44e-12	ACRBP
rs6993770	8	105569300	T	A	-0.0651582	0.00829213	3.91e-15	ACRBP
rs4736268	8	138863131	T	C	0.0448662	0.00882571	3.7e-07	ACRBP
rs74331022	11	30351271	T	C	-0.0355402	0.00681421	1.83e-07	ACRV1
rs77322490	11	125831449	T	C	0.0657608	0.00628231	1.22e-25	ACRV1
rs34737876	16	17562345	G	A	-0.029843	0.00498113	2.08e-09	ACRV1
rs11125188	2	48951297	T	G	0.0246709	0.0049018	4.83e-07	ACRV1
rs11743764	5	168765870	A	G	0.0483166	0.00974623	7.14e-07	ACRV1
rs1324551	10	88991759	T	C	-0.0602131	0.00682485	1.12e-18	ACTA2
rs12280926	11	2409160	T	C	-0.119182	0.0235188	4.03e-07	ACTA2
rs72481504	14	105881562	C	T	0.0443917	0.00905324	9.42e-07	ACTA2
rs8103278	19	45867123	A	G	-0.0372981	0.00717217	1.99e-07	ACTA2
rs17602729	1	114693436	A	G	0.0727251	0.0111977	8.32e-11	ACTN2
rs10908505	1	156498451	A	T	0.0397012	0.00786579	4.48e-07	ACTN2
rs10833711	11	22179217	A	G	0.0759145	0.00757024	1.15e-23	ACTN2
rs11054150	12	11003447	G	T	0.059689	0.0120332	7.04e-07	ACTN2
rs2039663	13	73522866	G	A	-0.0497254	0.00764234	7.69e-11	ACTN2
rs16959006	17	66247846	G	C	0.105742	0.0166901	2.36e-10	ACTN2
rs12975976	19	29766252	G	A	-0.0396278	0.00802819	7.97e-07	ACTN2
rs71449535	2	34827766	A	G	-0.0985836	0.0192944	3.23e-07	ACTN2
rs2894240	6	32250069	A	G	-0.0398331	0.00766166	2e-07	ACTN2
rs17069226	8	4182330	C	T	-0.0414376	0.00811215	3.25e-07	ACTN2
rs16866320	2	224905660	T	C	-0.198177	0.0386969	3.03e-07	ACTN4
rs140273947	5	113862623	A	T	-0.218653	0.0441466	7.31e-07	ACTN4
rs75581187	1	150770066	T	C	-0.0938953	0.0135768	4.65e-12	ACVRL1
rs11064083	12	6191105	T	C	0.040281	0.00740851	5.41e-08	ACVRL1
rs151261184	12	51787796	A	G	0.271703	0.0429917	2.62e-10	ACVRL1
rs35680116	12	51890663	T	C	0.544878	0.0145264	1e-200	ACVRL1
rs117308303	12	51957634	A	G	-0.219242	0.0151634	2.21e-47	ACVRL1
rs147950249	12	52010783	T	G	-0.223576	0.0292551	2.13e-14	ACVRL1
rs112978338	12	52019604	C	G	-0.119606	0.0169517	1.72e-12	ACVRL1
rs4904818	14	91852472	G	A	0.0398102	0.00702146	1.43e-08	ACVRL1
rs28640218	16	20347945	T	G	-0.0464808	0.00892718	1.92e-07	ACVRL1
rs704	17	28367840	A	G	-0.041043	0.00699403	4.4e-09	ACVRL1
rs75941710	18	60300422	C	A	-0.0406377	0.00802919	4.17e-07	ACVRL1
rs58761784	19	8427375	C	T	-0.0501038	0.00777459	1.16e-10	ACVRL1
rs2837988	21	41247617	A	C	0.0816304	0.00736382	1.48e-28	ACVRL1
rs382672	21	41329725	A	T	-0.0573311	0.0115251	6.54e-07	ACVRL1
rs6776201	3	23821423	A	G	0.0664991	0.0134271	7.32e-07	ACVRL1
rs28394165	4	76472865	C	T	0.0398645	0.00699318	1.19e-08	ACVRL1
rs13107325	4	102267552	T	C	0.0655163	0.0133772	9.7e-07	ACVRL1
rs6866769	5	115672760	A	G	-0.04748	0.00892976	1.05e-07	ACVRL1
rs9461787	6	32644307	G	A	-0.0818897	0.0132261	5.96e-10	ACVRL1
rs10228436	7	55170575	A	G	0.0372718	0.00748062	6.28e-07	ACVRL1
rs73728279	7	151714408	T	G	0.0401381	0.00776177	2.33e-07	ACVRL1
rs11244079	9	133317691	A	G	0.110235	0.0160551	6.6e-12	ACVRL1
rs10883451	10	100164661	C	T	-0.0356023	0.0070662	4.69e-07	ACY1
rs4084164	11	62433986	G	A	-0.0406313	0.00738815	3.81e-08	ACY1
rs4753124	11	94090069	G	C	-0.0690445	0.0114766	1.79e-09	ACY1
rs2239194	12	111445975	T	C	-0.0681647	0.0134146	3.75e-07	ACY1
rs58542926	19	19268740	T	C	0.0815356	0.0134538	1.36e-09	ACY1
rs7256200	19	44912678	T	G	-0.0553559	0.0106984	2.29e-07	ACY1
rs1260326	2	27508073	C	T	-0.0707231	0.00727462	2.43e-22	ACY1
rs34889979	2	112041657	A	G	0.0557595	0.0101118	3.5e-08	ACY1
rs3747207	22	43928975	A	G	0.076579	0.00860201	5.46e-19	ACY1
rs148312732	3	47597979	T	G	-0.202208	0.035507	1.23e-08	ACY1
rs77534950	3	48699935	G	A	-0.187034	0.0353212	1.19e-07	ACY1
rs143827255	3	50081211	A	G	-0.150101	0.0213579	2.1e-12	ACY1
rs148996405	3	50760843	C	G	-0.182496	0.0339238	7.47e-08	ACY1
rs150416778	3	51982820	T	C	-0.462066	0.0264537	2.56e-68	ACY1
rs6789488	3	136427188	C	T	0.0434045	0.00824687	1.42e-07	ACY1
rs6825927	4	39240676	G	A	0.0382272	0.00778713	9.15e-07	ACY1
rs57071012	6	28982236	T	C	-0.114082	0.0230694	7.61e-07	ACY1
rs12206810	6	33054260	T	C	0.132391	0.0253208	1.71e-07	ACY1
rs112875651	8	125494452	A	G	-0.0475808	0.00735602	9.91e-11	ACY1
rs10119644	9	114367312	A	T	-0.0466881	0.00713356	5.96e-11	ACY1
rs72741370	1	207025498	C	A	-0.108725	0.0221603	9.28e-07	ACY3
rs10883451	10	100164661	C	T	-0.0371147	0.00732974	4.11e-07	ACY3
rs55966801	11	200343	C	T	0.0458872	0.00908613	4.41e-07	ACY3
rs684372	11	65852842	A	G	-0.12782	0.0254228	4.96e-07	ACY3
rs35957860	11	65889485	T	C	-0.103759	0.0210915	8.68e-07	ACY3
rs117391369	11	66794369	C	G	-0.215539	0.0322393	2.3e-11	ACY3
rs142499976	11	67295290	A	G	-0.156423	0.0317017	8.05e-07	ACY3
rs12794995	11	67605475	A	G	0.281421	0.00851663	1e-200	ACY3
rs2509717	11	67648904	C	T	0.235814	0.0129485	4.17e-74	ACY3
rs192744022	11	67718189	C	A	-0.249977	0.0326043	1.76e-14	ACY3
rs11123109	2	112048606	A	G	0.0505177	0.00739243	8.28e-12	ACY3
rs6057570	20	32400295	T	A	0.0726859	0.00973149	8.07e-14	ACY3
rs17274750	21	14981488	C	A	0.0614628	0.0123529	6.5e-07	ACY3
rs738409	22	43928847	G	C	0.0643641	0.00888947	4.47e-13	ACY3
rs4676609	3	39172765	T	C	-0.0528328	0.00925141	1.12e-08	ACY3
rs34103191	4	68493562	G	A	-0.0462627	0.00780789	3.12e-09	ACY3
rs6894249	5	132461855	G	A	-0.0631777	0.00755901	6.38e-17	ACY3
rs3130521	6	31228599	C	T	0.0377858	0.00759146	6.44e-07	ACY3
rs799158	7	73604744	C	T	-0.0945813	0.0183581	2.58e-07	ACY3
rs13263370	8	71057299	C	A	-0.0403714	0.00746797	6.45e-08	ACY3
rs1964528	8	75477823	T	C	-0.091095	0.0116848	6.39e-15	ACY3
rs112875651	8	125494452	A	G	-0.0528198	0.00763564	4.6e-12	ACY3
rs2272662	8	144414342	C	T	-0.0456061	0.00744228	8.9e-10	ACY3
rs773519	9	91181962	T	C	-0.0497771	0.00942134	1.27e-07	ACY3
rs144745327	1	225451619	T	C	-0.173828	0.0343313	4.12e-07	ACYP1
rs2393967	10	63373396	C	A	0.0560529	0.00793596	1.63e-12	ACYP1
rs11603942	11	266804	T	C	0.0419841	0.00850328	7.92e-07	ACYP1
rs35979828	12	54292096	T	C	-0.0814757	0.0144636	1.77e-08	ACYP1
rs73217246	12	119350754	C	A	0.0890528	0.018025	7.79e-07	ACYP1
rs7330042	13	113368711	T	A	0.0520097	0.0103107	4.55e-07	ACYP1
rs368436435	14	74398360	T	C	0.145801	0.0278247	1.61e-07	ACYP1
rs187335055	14	75038862	A	G	-0.161617	0.0302541	9.19e-08	ACYP1
rs68179743	14	75040954	A	C	0.165864	0.0164171	5.35e-24	ACYP1
rs28756986	14	75047786	G	C	-1.23686	0.0352219	1e-200	ACYP1
rs892090	19	55027704	G	T	0.0486559	0.00989581	8.8e-07	ACYP1
rs7618405	3	18209017	A	C	-0.0456889	0.00912045	5.46e-07	ACYP1
rs1354034	3	56815721	C	T	0.0664062	0.00747594	6.53e-19	ACYP1
rs10112438	8	105249706	A	G	-0.0399731	0.00751243	1.03e-07	ACYP1
rs6993770	8	105569300	T	A	-0.0583575	0.00810504	6.01e-13	ACYP1
rs692502	9	4745645	A	G	0.0373466	0.00746348	5.62e-07	ACYP1
rs56381934	9	109989104	G	A	0.20176	0.0407915	7.57e-07	ACYP1
rs597808	12	111535554	G	A	-0.0494145	0.00653039	3.82e-14	ADA
rs231971	16	28525198	G	A	0.0627927	0.0120688	1.96e-07	ADA
rs9635868	18	7334329	C	T	-0.0733715	0.0142777	2.76e-07	ADA
rs13019832	2	60483436	A	G	-0.0326233	0.00664228	9.04e-07	ADA
rs13015258	2	162074215	G	T	-0.0375589	0.00677929	3.02e-08	ADA
rs149266751	20	44351392	G	A	0.0851713	0.010617	1.04e-15	ADA
rs6103738	20	44438874	G	C	0.269821	0.00888431	1e-200	ADA
rs389308	20	44649909	G	A	0.237968	0.00759574	1e-200	ADA
rs36029929	20	44713322	T	C	0.146263	0.01202	4.59e-34	ADA
rs13043441	20	44735667	G	A	-0.0455022	0.00748725	1.22e-09	ADA
rs9816170	3	22150593	T	C	-0.035064	0.00654654	8.5e-08	ADA
rs1084382	6	70689448	A	G	0.0379046	0.00753062	4.82e-07	ADA
rs5011436	7	12229132	C	A	0.0326374	0.0066476	9.12e-07	ADA
rs10953260	7	98404180	C	T	-0.0431758	0.0085153	3.97e-07	ADA
rs13248299	8	105294533	T	C	-0.0388715	0.0065687	3.26e-09	ADA
rs60757417	9	132989049	G	C	-0.0931161	0.0138424	1.73e-11	ADA
rs9435341	1	107074019	C	T	-0.0392026	0.00762214	2.7e-07	ADA2
rs2099684	1	161530340	G	A	0.0387765	0.0078001	6.65e-07	ADA2
rs56278466	10	17833858	G	T	0.0759478	0.007563	9.96e-24	ADA2
rs71489109	10	37190127	C	T	0.0999537	0.0196708	3.75e-07	ADA2
rs2671694	10	48908030	T	G	0.0377978	0.00722383	1.67e-07	ADA2
rs7077566	10	95858186	A	G	-0.038425	0.00720726	9.74e-08	ADA2
rs12575367	11	17339043	G	A	0.0620653	0.00784676	2.58e-15	ADA2
rs11039216	11	47385041	T	C	0.0402558	0.0072132	2.39e-08	ADA2
rs4055121	11	126362442	T	C	-0.0531006	0.0105676	5.04e-07	ADA2
rs1513105	12	70704388	G	T	-0.0360919	0.00725897	6.63e-07	ADA2
rs76889468	12	101764986	A	G	0.192184	0.0288124	2.56e-11	ADA2
rs139196635	12	101863758	A	G	0.159377	0.0255227	4.25e-10	ADA2
rs3184504	12	111446804	C	T	-0.12937	0.00717956	1.38e-72	ADA2
rs76428106	13	28029870	C	T	0.223586	0.0330838	1.4e-11	ADA2
rs198607	13	48405031	C	T	0.0422802	0.00807936	1.67e-07	ADA2
rs28929474	14	94378610	T	C	0.158677	0.0251239	2.69e-10	ADA2
rs75610873	16	54144836	G	A	0.0672893	0.0131723	3.25e-07	ADA2
rs62061425	17	7169772	G	A	0.0975038	0.00893645	1.02e-27	ADA2
rs78196338	17	68976908	A	G	0.100585	0.0188049	8.85e-08	ADA2
rs485186	19	48703949	G	A	0.0500894	0.00724362	4.68e-12	ADA2
rs1260326	2	27508073	C	T	0.0373818	0.00736057	3.8e-07	ADA2
rs72930772	2	202754954	T	C	0.0786155	0.00764098	7.93e-25	ADA2
rs737963	22	17228881	C	T	0.206755	0.00757212	3.72e-164	ADA2
rs2041144	22	17242284	G	C	-0.163254	0.0075859	9.95e-103	ADA2
rs738409	22	43928847	G	C	0.0775657	0.00885003	1.88e-18	ADA2
rs13091182	3	141415118	A	G	0.0372321	0.0075818	9.07e-07	ADA2
rs10017466	4	99134649	T	C	-0.0461743	0.00777038	2.81e-09	ADA2
rs2903386	4	105178652	C	T	0.0577414	0.00743983	8.42e-15	ADA2
rs246456	5	96787385	T	C	-0.0417896	0.00758615	3.62e-08	ADA2
rs2548999	5	132495366	T	G	0.0514967	0.00761145	1.33e-11	ADA2
rs986475	6	31588932	G	A	-0.0698243	0.0142242	9.16e-07	ADA2
rs535777	6	32609856	C	G	0.156136	0.010471	2.78e-50	ADA2
rs11773763	7	50231903	T	C	-0.0465203	0.00763887	1.13e-09	ADA2
rs7012395	8	8680499	C	T	-0.0413983	0.00783247	1.25e-07	ADA2
rs7895449	10	125968380	T	C	-0.0769405	0.00797068	4.78e-22	ADAM12
rs11244909	10	126256024	C	T	0.129391	0.00780317	9.42e-62	ADAM12
rs7082031	10	126350148	C	T	-0.104229	0.00766704	4.32e-42	ADAM12
rs1556817	13	72579838	A	G	0.0386555	0.00768229	4.86e-07	ADAM12
rs34175245	1	26675220	G	A	-0.071029	0.0133203	9.69e-08	ADAM15
rs4845672	1	154794865	T	C	-0.122415	0.00949361	4.84e-38	ADAM15
rs1218582	1	154861707	A	G	-0.276642	0.00766222	1e-200	ADAM15
rs6427137	1	155075893	G	A	-0.603146	0.0150149	1e-200	ADAM15
rs2990246	1	155227811	C	G	-0.308807	0.00781224	1e-200	ADAM15
rs11264427	1	155999201	C	T	-0.155861	0.0122468	4.21e-37	ADAM15
rs114911624	1	156067566	T	C	-0.271643	0.0247537	5.11e-28	ADAM15
rs181242111	10	17823665	A	G	0.050224	0.0100025	5.14e-07	ADAM15
rs56278466	10	17833858	G	T	0.0433876	0.00633939	7.69e-12	ADAM15
rs7099612	10	80543523	G	A	-0.036654	0.00634839	7.75e-09	ADAM15
rs74612335	11	126368738	C	T	-0.0532307	0.00890078	2.23e-09	ADAM15
rs495893	11	128184493	A	C	-0.0373669	0.00661041	1.58e-08	ADAM15
rs3184504	12	111446804	C	T	-0.0608545	0.0059918	3.11e-24	ADAM15
rs138884648	13	80206421	A	G	-0.132725	0.026176	3.97e-07	ADAM15
rs55714927	17	7176997	T	C	0.0748538	0.00760246	7.13e-23	ADAM15
rs62059198	17	7317378	T	G	0.032153	0.006384	4.74e-07	ADAM15
rs8115204	20	58706793	T	C	0.0467192	0.00952753	9.41e-07	ADAM15
rs738409	22	43928847	G	C	0.0464844	0.00726896	1.61e-10	ADAM15
rs2236947	3	50334001	A	C	0.0403496	0.00604447	2.46e-11	ADAM15
rs34458031	3	99033191	A	G	0.0586514	0.0107571	4.97e-08	ADAM15
rs9260671	6	29957056	A	T	0.0531781	0.00817955	7.96e-11	ADAM15
rs77468121	6	31377707	A	G	0.117068	0.0147285	1.89e-15	ADAM15
rs2294676	6	155417572	C	G	0.0539637	0.0110062	9.44e-07	ADAM15
rs9987289	8	9325848	G	A	-0.059582	0.0103929	9.87e-09	ADAM15
rs62571868	9	110363931	T	A	0.0494178	0.00727044	1.07e-11	ADAM15
rs11244038	9	133220383	C	G	0.456184	0.013946	1e-200	ADAM15
rs183489441	9	133584820	A	G	0.0716448	0.0110028	7.44e-11	ADAM15
rs1557648	9	133717886	G	A	0.0420815	0.00757037	2.72e-08	ADAM15
rs570572	1	5276740	G	T	-0.0339763	0.00687373	7.7e-07	ADAM22
rs4660883	1	45770426	A	G	0.0412211	0.00734084	1.96e-08	ADAM22
rs2065944	1	47483126	G	A	0.0439811	0.00859753	3.13e-07	ADAM22
rs61747728	1	179557079	T	C	0.168747	0.0175495	6.88e-22	ADAM22
rs61839799	1	246445303	C	T	0.0370009	0.00754478	9.38e-07	ADAM22
rs7107284	11	36005395	A	G	0.0846093	0.0164303	2.61e-07	ADAM22
rs10791824	11	65791795	G	A	0.0351103	0.0068125	2.55e-07	ADAM22
rs11636578	15	101247764	C	T	0.0410508	0.00722093	1.31e-08	ADAM22
rs4997081	16	20353912	C	G	-0.0637316	0.00856695	1.01e-13	ADAM22
rs2659005	17	81244914	T	C	0.0505844	0.00679613	9.83e-14	ADAM22
rs1672981	19	35056147	C	T	-0.0774997	0.0136285	1.3e-08	ADAM22
rs1260326	2	27508073	C	T	0.0386756	0.00690995	2.18e-08	ADAM22
rs75166367	2	162107791	A	G	-0.112197	0.0141614	2.32e-15	ADAM22
rs17304002	2	206342413	T	C	-0.0346252	0.00706672	9.6e-07	ADAM22
rs6107859	20	738739	T	G	-0.0423304	0.0083753	4.32e-07	ADAM22
rs6126606	20	52556574	G	A	-0.0377568	0.00742897	3.73e-07	ADAM22
rs4821491	22	36441726	C	T	-0.0536051	0.0103667	2.33e-07	ADAM22
rs2267372	22	38202227	G	A	0.0396144	0.00687221	8.19e-09	ADAM22
rs6787229	3	46847697	A	G	0.0713086	0.0113347	3.15e-10	ADAM22
rs13107325	4	102267552	T	C	0.0650386	0.0128687	4.33e-07	ADAM22
rs13153019	5	177355217	C	T	0.0419977	0.0078653	9.31e-08	ADAM22
rs2735055	6	29731671	A	G	-0.0347655	0.00674286	2.52e-07	ADAM22
rs34616897	7	87351324	G	A	0.297673	0.0189799	1.96e-55	ADAM22
rs6978925	7	87507699	T	C	-0.298678	0.00900211	1e-200	ADAM22
rs2285647	7	87837656	A	G	-0.305541	0.00823759	1e-200	ADAM22
rs11761151	7	88434230	A	C	-0.0765681	0.0075967	6.83e-24	ADAM22
rs181112	7	88447059	T	A	-0.0878689	0.00972851	1.68e-19	ADAM22
rs13223100	7	89185245	C	T	-0.0603275	0.00930928	9.15e-11	ADAM22
rs10265221	7	151717243	C	T	0.0414955	0.00831482	6.02e-07	ADAM22
rs530520	1	47488560	A	C	0.0513373	0.0100393	3.16e-07	ADAM23
rs602633	1	109278889	G	T	0.0472853	0.00758353	4.51e-10	ADAM23
rs61747728	1	179557079	T	C	0.120934	0.0162789	1.1e-13	ADAM23
rs2298475	11	126408308	C	T	-0.0662307	0.011826	2.14e-08	ADAM23
rs597808	12	111535554	G	A	0.036966	0.00625136	3.35e-09	ADAM23
rs567223	12	114672766	T	G	0.0312586	0.00629085	6.73e-07	ADAM23
rs12934455	16	20345959	T	C	-0.0532925	0.00844718	2.81e-10	ADAM23
rs185053	16	75476314	A	G	-0.036763	0.00744215	7.82e-07	ADAM23
rs55714927	17	7176997	T	C	0.0548573	0.00791667	4.23e-12	ADAM23
rs2659007	17	81243678	A	G	0.0337699	0.00631209	8.79e-08	ADAM23
rs2304242	19	41438711	T	G	-0.0685611	0.00641399	1.14e-26	ADAM23
rs4675557	2	205877986	T	C	-0.0383582	0.0077573	7.62e-07	ADAM23
rs62195375	2	206091415	C	T	-0.261021	0.00844566	1e-200	ADAM23
rs141950547	2	206516844	T	C	-1.06438	0.0247643	1e-200	ADAM23
rs6749661	2	206656834	C	T	0.38302	0.00949805	1e-200	ADAM23
rs148565219	2	206726719	G	A	-0.651248	0.0276577	1.36e-122	ADAM23
rs17219423	2	207199239	T	C	0.17792	0.0305033	5.45e-09	ADAM23
rs141139355	2	207210878	T	C	-0.183317	0.0202454	1.37e-19	ADAM23
rs148951991	2	207608843	T	C	0.407333	0.0477688	1.5e-17	ADAM23
rs115029012	5	159772331	T	G	0.16141	0.0308271	1.64e-07	ADAM23
rs1294438	6	6751826	T	C	0.0561532	0.00663661	2.65e-17	ADAM23
rs2714337	6	7240344	T	A	0.0377029	0.00659951	1.11e-08	ADAM23
rs9267948	6	32244456	A	G	0.0385968	0.00631737	9.99e-10	ADAM23
rs66471312	7	77221788	C	T	0.0417425	0.00846339	8.13e-07	ADAM23
rs62621812	7	127375029	A	G	0.131244	0.0223295	4.16e-09	ADAM23
rs8176741	9	133256074	A	G	0.221679	0.0131441	8.1e-64	ADAM23
rs11806326	1	25572674	G	T	0.0695596	0.0072332	6.8e-22	ADAM8
rs3917932	1	36478315	G	C	-0.0392061	0.00727231	7e-08	ADAM8
rs3008373	10	133247368	C	T	-0.538762	0.0137711	1e-200	ADAM8
rs111298409	10	133251241	A	G	-0.217736	0.0241872	2.21e-19	ADAM8
rs118007277	10	133267241	A	G	-0.26953	0.0239456	2.16e-29	ADAM8
rs12779986	10	133330402	C	A	-0.183143	0.0160374	3.33e-30	ADAM8
rs141625332	10	133520755	T	C	0.357121	0.0461791	1.05e-14	ADAM8
rs3813865	10	133525740	C	G	0.139968	0.0263064	1.03e-07	ADAM8
rs41299432	10	133535875	C	T	-0.269087	0.0327925	2.29e-16	ADAM8
rs199551438	11	44101953	G	A	0.0416978	0.00797076	1.68e-07	ADAM8
rs4055121	11	126362442	T	C	-0.0861846	0.0105068	2.35e-16	ADAM8
rs3184504	12	111446804	C	T	-0.105943	0.00712308	4.92e-50	ADAM8
rs10849818	12	120926700	T	A	-0.0362403	0.00716581	4.25e-07	ADAM8
rs76428106	13	28029870	C	T	0.254871	0.0328328	8.32e-15	ADAM8
rs4778769	15	80233698	T	C	-0.0360445	0.00723015	6.19e-07	ADAM8
rs2227319	17	40014592	A	G	-0.0762955	0.00737867	4.65e-25	ADAM8
rs9899887	17	81292286	C	A	-0.0406588	0.00725612	2.1e-08	ADAM8
rs28616221	19	35063575	A	G	-0.0472876	0.0093403	4.13e-07	ADAM8
rs112694524	2	43226582	A	G	0.0786608	0.0141963	3.01e-08	ADAM8
rs10211223	2	201756279	C	T	0.0541772	0.00972395	2.53e-08	ADAM8
rs3790315	20	17649400	T	C	-0.0457533	0.00720534	2.15e-10	ADAM8
rs28460831	3	187063125	G	T	0.0962839	0.0147814	7.33e-11	ADAM8
rs2703478	4	54608274	T	C	-0.0385957	0.0075764	3.5e-07	ADAM8
rs2596530	6	31419596	A	G	-0.0588732	0.00714079	1.66e-16	ADAM8
rs3134931	6	32222843	C	T	-0.0418391	0.00781548	8.63e-08	ADAM8
rs10944312	6	87461909	T	G	0.0481029	0.00902082	9.69e-08	ADAM8
rs2181069	6	155483515	C	T	-0.0527666	0.0104493	4.42e-07	ADAM8
rs7388879	9	134953779	A	C	0.0509961	0.00807462	2.69e-10	ADAM8
rs2446624	1	161649571	T	C	0.0738707	0.0139334	1.15e-07	ADAM9
rs150816167	1	179602727	C	T	0.0941306	0.0187661	5.28e-07	ADAM9
rs7913905	10	19704288	T	G	-0.0618462	0.00754364	2.44e-16	ADAM9
rs34307716	10	19910449	A	G	0.132207	0.00837764	4.21e-56	ADAM9
rs877081	14	94376746	A	G	-0.0833577	0.0108274	1.37e-14	ADAM9
rs4293393	16	20353266	G	A	-0.050643	0.00960556	1.35e-07	ADAM9
rs55714927	17	7176997	T	C	0.0726957	0.00936779	8.48e-15	ADAM9
rs1257168	2	134206321	G	A	-0.0389464	0.00743866	1.64e-07	ADAM9
rs11689257	2	162101843	A	G	-0.0745053	0.0150358	7.23e-07	ADAM9
rs10932178	2	207128564	C	T	-0.045081	0.00800289	1.77e-08	ADAM9
rs11130650	3	58484981	C	T	0.0428165	0.00851305	4.92e-07	ADAM9
rs2281071	6	25621984	A	G	-0.0414527	0.00784913	1.28e-07	ADAM9
rs9267123	6	31459618	C	G	0.137028	0.0102099	4.55e-41	ADAM9
rs112991094	8	38958547	T	C	-0.142488	0.0258192	3.42e-08	ADAM9
rs112392635	8	39066130	G	T	0.206682	0.0250817	1.72e-16	ADAM9
rs141636923	8	39072702	G	A	-0.148166	0.0269995	4.07e-08	ADAM9
rs72640004	8	39080587	T	C	-0.115079	0.0190654	1.58e-09	ADAM9
rs117318607	8	39089755	G	A	0.399152	0.0257817	4.59e-54	ADAM9
rs117392723	8	39365376	T	G	-0.124363	0.0204047	1.1e-09	ADAM9
rs2831907	21	28582553	T	C	-0.0684374	0.0119673	1.07e-08	ADAMTS1
rs7012749	8	30156243	C	A	0.0711035	0.0139895	3.72e-07	ADAMTS1
rs11264341	1	155179017	T	C	0.0372326	0.00716845	2.06e-07	ADAMTS13
rs145279906	1	217205745	T	C	0.17417	0.0352524	7.79e-07	ADAMTS13
rs114376812	10	112364518	C	G	-0.17293	0.030403	1.29e-08	ADAMTS13
rs11025639	11	3151684	A	G	-0.0362361	0.00733304	7.75e-07	ADAMTS13
rs652455	11	117200733	T	C	-0.0502723	0.010038	5.49e-07	ADAMTS13
rs11606532	11	122664903	A	G	0.0456835	0.00738522	6.18e-10	ADAMTS13
rs113566801	12	6120405	T	C	0.090877	0.0139944	8.37e-11	ADAMTS13
rs1389065	12	91384364	A	G	-0.0585545	0.0084202	3.55e-12	ADAMTS13
rs10860794	12	101823942	A	C	-0.049801	0.00788642	2.71e-10	ADAMTS13
rs12318001	12	104581173	C	T	-0.0989603	0.0122088	5.25e-16	ADAMTS13
rs67279017	12	120603421	A	C	0.0662936	0.0127099	1.83e-07	ADAMTS13
rs28929474	14	94378610	T	C	0.131841	0.0248816	1.17e-07	ADAMTS13
rs4924115	15	37006778	T	C	-0.0700778	0.0127017	3.44e-08	ADAMTS13
rs1976703	17	78405247	T	C	0.0398115	0.00714167	2.48e-08	ADAMTS13
rs58635421	17	83082317	A	C	-0.0393762	0.00800285	8.64e-07	ADAMTS13
rs17070848	18	63238267	T	C	-0.0457889	0.00910443	4.92e-07	ADAMTS13
rs9789310	19	5095783	A	G	-0.0369734	0.00753447	9.24e-07	ADAMTS13
rs56254331	19	41320115	C	A	0.070362	0.00944724	9.48e-14	ADAMTS13
rs11123201	2	110843901	A	G	-0.0414328	0.00740199	2.17e-08	ADAMTS13
rs13389219	2	164672366	T	C	-0.0405145	0.00725664	2.36e-08	ADAMTS13
rs1515114	2	226233671	G	A	0.0355753	0.00712159	5.87e-07	ADAMTS13
rs10182982	2	241464506	A	T	0.0409647	0.00713527	9.4e-09	ADAMTS13
rs2236251	20	17616400	T	C	0.0530478	0.00834004	2.01e-10	ADAMTS13
rs4810479	20	45916409	T	C	-0.039842	0.00814285	9.94e-07	ADAMTS13
rs738408	22	43928850	T	C	0.0635185	0.0085801	1.33e-13	ADAMTS13
rs4282054	3	52532049	C	T	0.048553	0.00716319	1.22e-11	ADAMTS13
rs940895	3	154969673	A	C	0.0387081	0.00784059	7.94e-07	ADAMTS13
rs6767451	3	186648427	G	A	-0.0357093	0.00722498	7.71e-07	ADAMTS13
rs13106226	4	39622304	A	G	0.0362752	0.00710811	3.34e-07	ADAMTS13
rs13135092	4	102276925	G	A	0.0671948	0.0129588	2.16e-07	ADAMTS13
rs6858276	4	174152939	G	A	0.0539311	0.00714505	4.42e-14	ADAMTS13
rs6553780	4	174315215	G	A	-0.0419036	0.00805485	1.97e-07	ADAMTS13
rs4235705	5	77869637	G	A	0.0571604	0.0113097	4.32e-07	ADAMTS13
rs2910686	5	96916885	C	T	0.0747168	0.00716036	1.72e-25	ADAMTS13
rs512956	5	172888069	A	C	0.0397945	0.00724458	3.95e-08	ADAMTS13
rs557441	6	10528854	C	T	0.0663395	0.0132916	6e-07	ADAMTS13
rs1039086	6	147336376	A	T	-0.0482667	0.00716515	1.62e-11	ADAMTS13
rs10253113	7	130369470	G	A	0.0661043	0.00774443	1.39e-17	ADAMTS13
rs9987289	8	9325848	G	A	-0.0957627	0.012284	6.4e-15	ADAMTS13
rs10504167	8	54558857	T	C	-0.0580965	0.0103997	2.32e-08	ADAMTS13
rs1134027	8	143977246	A	G	0.0400122	0.00741745	6.88e-08	ADAMTS13
rs117993921	9	133131462	T	C	-0.217529	0.0266456	3.25e-16	ADAMTS13
rs10901263	9	133326035	A	G	0.158927	0.00848248	2.53e-78	ADAMTS13
rs4962130	9	133328771	C	T	-1.22647	0.029857	1e-200	ADAMTS13
rs34008151	9	133478465	T	C	-0.135043	0.0221595	1.1e-09	ADAMTS13
rs117134959	9	133508935	G	A	0.187194	0.0282156	3.26e-11	ADAMTS13
rs117362891	9	133513472	T	C	0.135088	0.0268563	4.9e-07	ADAMTS13
rs1611115	9	133635393	C	T	0.0683977	0.00921826	1.17e-13	ADAMTS13
rs73044885	11	130474168	A	G	0.192702	0.0173208	9.43e-29	ADAMTS15
rs3794132	11	130897857	C	G	0.0786467	0.00808689	2.35e-22	ADAMTS15
rs61978891	14	81291094	T	C	-0.0633602	0.0126858	5.9e-07	ADAMTS15
rs141866277	15	43658501	T	A	-0.142733	0.0252423	1.56e-08	ADAMTS15
rs164751	16	89641228	T	G	0.0504549	0.00771528	6.17e-11	ADAMTS15
rs12945299	17	7176750	G	A	0.0632714	0.0094246	1.9e-11	ADAMTS15
rs2905873	17	31205338	C	A	-0.0413044	0.008157	4.11e-07	ADAMTS15
rs1065853	19	44909976	T	G	0.0801489	0.0138459	7.1e-09	ADAMTS15
rs191231316	3	80622477	A	G	0.189244	0.0383596	8.08e-07	ADAMTS15
rs1394094	3	136476946	T	A	0.0448368	0.00787293	1.23e-08	ADAMTS15
rs5030062	3	186736391	C	A	-0.0667523	0.0078107	1.27e-17	ADAMTS15
rs4861708	4	186236079	A	G	-0.12382	0.00755857	2.6e-60	ADAMTS15
rs2545801	5	177414338	C	T	-0.0965691	0.00859765	2.84e-29	ADAMTS15
rs3099844	6	31481199	A	C	-0.0602332	0.0106833	1.72e-08	ADAMTS15
rs544782191	7	72849563	T	C	-0.25888	0.0513153	4.54e-07	ADAMTS15
rs28371583	1	207321334	G	A	0.0571021	0.00815163	2.47e-12	ADAMTS16
rs11605422	11	122663482	T	C	0.0364034	0.0072757	5.63e-07	ADAMTS16
rs77242400	13	40221669	A	G	0.199126	0.0385293	2.36e-07	ADAMTS16
rs12050196	14	99673097	T	C	-0.0350653	0.00710817	8.09e-07	ADAMTS16
rs2470893	15	74727108	T	C	0.0391991	0.00741695	1.26e-07	ADAMTS16
rs72842819	17	7425502	C	A	-0.0537077	0.0107106	5.32e-07	ADAMTS16
rs1346786	2	55881198	T	C	0.0403775	0.00770617	1.61e-07	ADAMTS16
rs9647379	3	172067378	C	G	-0.03784	0.00713406	1.13e-07	ADAMTS16
rs40468	5	4982701	G	A	-0.122806	0.00745287	5.3e-61	ADAMTS16
rs6555331	5	5154345	C	T	0.0804541	0.00713201	1.63e-29	ADAMTS16
rs72724169	5	5244208	A	G	0.0979187	0.0187102	1.66e-07	ADAMTS16
rs16875213	5	5280338	A	G	-0.0963434	0.0140345	6.66e-12	ADAMTS16
rs16875264	5	5290697	C	T	0.287411	0.0206472	4.78e-44	ADAMTS16
rs11741640	5	177365742	A	G	0.0412905	0.00804255	2.84e-07	ADAMTS16
rs11751347	6	160671406	T	C	-0.0665378	0.0115303	7.89e-09	ADAMTS16
rs4656993	1	161206347	G	A	-0.118273	0.00765875	8.42e-54	ADAMTS4
rs6425146	1	172875613	G	C	0.0496139	0.00878076	1.6e-08	ADAMTS4
rs17625587	1	199021365	A	G	0.057045	0.00864059	4.06e-11	ADAMTS4
rs10492190	12	16707042	C	T	-0.0439269	0.00869749	4.41e-07	ADAMTS4
rs111996076	14	45020741	G	C	-0.0830877	0.0168668	8.39e-07	ADAMTS4
rs12445050	16	81837364	T	C	0.0563261	0.0108719	2.21e-07	ADAMTS4
rs1020383	19	267474	G	A	-0.0421021	0.00815949	2.47e-07	ADAMTS4
rs61658003	19	55032835	A	C	0.0702278	0.0104226	1.61e-11	ADAMTS4
rs1033549	20	19291296	T	G	0.0457617	0.00776857	3.85e-09	ADAMTS4
rs35825078	4	89207531	C	T	0.0568673	0.0115146	7.86e-07	ADAMTS4
rs6927431	6	22518330	A	T	0.0477956	0.00871131	4.1e-08	ADAMTS4
rs566530	6	25878133	C	T	0.0375316	0.00753858	6.4e-07	ADAMTS4
rs150956426	9	111244169	T	G	0.195683	0.0371602	1.39e-07	ADAMTS4
rs61232586	1	39620685	T	G	-0.0417499	0.00836092	5.93e-07	ADAMTS8
rs7529464	1	230277090	C	G	0.0646215	0.00795149	4.4e-16	ADAMTS8
rs7095308	10	119666800	A	G	0.0483913	0.00770724	3.41e-10	ADAMTS8
rs117056648	11	130182750	G	A	0.119126	0.019354	7.5e-10	ADAMTS8
rs150289036	11	130259413	T	G	0.140964	0.0257603	4.45e-08	ADAMTS8
rs17139325	11	130319024	C	T	0.215152	0.0227958	3.79e-21	ADAMTS8
rs7130658	11	130388128	C	T	0.433065	0.00967721	1e-200	ADAMTS8
rs182462979	11	130396363	T	C	0.390077	0.0417746	9.85e-21	ADAMTS8
rs188303660	11	130402514	T	C	0.362432	0.0456387	2e-15	ADAMTS8
rs55773438	11	130444845	G	A	0.407202	0.0367194	1.41e-28	ADAMTS8
rs2282578	11	130865796	T	A	0.17262	0.00760741	5.48e-114	ADAMTS8
rs113663706	16	1015254	A	G	-0.106881	0.0205205	1.9e-07	ADAMTS8
rs7209484	17	48065680	C	T	0.0600426	0.00805408	8.99e-14	ADAMTS8
rs1260326	2	27508073	C	T	0.0388989	0.0070314	3.16e-08	ADAMTS8
rs13397682	2	202083472	T	C	0.0401131	0.00796241	4.71e-07	ADAMTS8
rs78058190	2	218835276	A	G	0.108044	0.0174851	6.44e-10	ADAMTS8
rs10929275	2	238414528	G	A	-0.0363038	0.00690904	1.48e-07	ADAMTS8
rs9818188	3	134664113	T	C	-0.0389815	0.00719091	5.93e-08	ADAMTS8
rs13107325	4	102267552	T	C	-0.144076	0.0130803	3.24e-28	ADAMTS8
rs507449	6	133197987	C	G	-0.0508039	0.00874011	6.15e-09	ADAMTS8
rs212775	6	133476725	G	A	0.0426276	0.00688857	6.09e-10	ADAMTS8
rs11780422	8	138904666	G	A	-0.0470701	0.00893255	1.37e-07	ADAMTS8
rs75244604	1	76646404	A	T	-0.0951412	0.0193215	8.47e-07	ADAMTSL2
rs61830291	1	220827800	C	A	0.141446	0.0125952	2.9e-29	ADAMTSL2
rs12421055	11	122657644	C	A	0.0461964	0.00858755	7.47e-08	ADAMTSL2
rs111584215	12	56562991	T	C	-0.0603904	0.0119726	4.56e-07	ADAMTSL2
rs4964751	12	108765515	A	G	-0.0403284	0.00812365	6.89e-07	ADAMTSL2
rs168960	14	68758407	G	A	-0.103565	0.0134922	1.64e-14	ADAMTSL2
rs28929474	14	94378610	T	C	0.242428	0.0259516	9.49e-21	ADAMTSL2
rs143075816	15	29876437	T	C	0.117575	0.0234841	5.54e-07	ADAMTSL2
rs28360855	15	67166467	A	G	0.0382285	0.00754158	4e-07	ADAMTSL2
rs9932707	16	71828230	C	A	-0.0394465	0.00744669	1.18e-07	ADAMTSL2
rs1801689	17	66214462	C	A	0.148129	0.0216729	8.21e-12	ADAMTSL2
rs77542162	17	69085137	G	A	0.167237	0.0248013	1.55e-11	ADAMTSL2
rs72631343	17	69195129	G	C	-0.0598624	0.0112102	9.29e-08	ADAMTSL2
rs117328936	17	82638842	C	G	0.143452	0.0270725	1.17e-07	ADAMTSL2
rs10402712	19	33435107	A	G	-0.0438773	0.00845364	2.1e-07	ADAMTSL2
rs73045269	19	41319286	T	C	0.095876	0.0098531	2.23e-22	ADAMTSL2
rs17409597	2	145287492	C	T	0.0372773	0.00747655	6.17e-07	ADAMTSL2
rs259834	2	179896656	T	C	-0.0408294	0.0078588	2.04e-07	ADAMTSL2
rs56209234	2	191261748	C	T	0.039155	0.00799854	9.82e-07	ADAMTSL2
rs738409	22	43928847	G	C	0.0516169	0.008954	8.18e-09	ADAMTSL2
rs78420460	3	13648823	T	C	0.0475491	0.00940359	4.27e-07	ADAMTSL2
rs6795528	3	29986174	T	C	0.0455188	0.00900887	4.36e-07	ADAMTSL2
rs149953790	4	124903305	A	C	-0.147707	0.0298228	7.31e-07	ADAMTSL2
rs2239616	6	52570200	G	C	-0.0434661	0.00785834	3.18e-08	ADAMTSL2
rs7805303	7	35354730	C	T	-0.0597792	0.00790203	3.88e-14	ADAMTSL2
rs10253113	7	130369470	G	A	0.0444658	0.00808242	3.76e-08	ADAMTSL2
rs9987289	8	9325848	G	A	-0.0901126	0.0128152	2.04e-12	ADAMTSL2
rs7013638	8	122929234	G	A	-0.0506589	0.00992057	3.28e-07	ADAMTSL2
rs112243849	9	106098763	T	C	0.0991521	0.0195106	3.74e-07	ADAMTSL2
rs1008250	9	133532712	G	A	0.10608	0.0085307	1.68e-35	ADAMTSL2
rs7040825	9	133591485	C	T	0.0417668	0.00838839	6.39e-07	ADAMTSL2
rs1989787	9	133634290	T	C	-0.0474615	0.0078063	1.2e-09	ADAMTSL2
rs2027962	9	133720519	A	C	-0.055328	0.00768285	5.96e-13	ADAMTSL2
rs3170740	1	16986248	T	C	-0.0377583	0.00751625	5.07e-07	ADAMTSL4
rs6664145	1	150042628	T	C	-0.32893	0.0374558	1.61e-18	ADAMTSL4
rs12044791	1	150276027	C	T	0.306096	0.0434215	1.8e-12	ADAMTSL4
rs12067556	1	150642059	A	G	0.188563	0.00781546	1.3e-128	ADAMTSL4
rs4587566	1	151220702	G	C	-0.337518	0.0258407	5.47e-39	ADAMTSL4
rs7529464	1	230277090	C	G	0.0502634	0.00866324	6.56e-09	ADAMTSL4
rs11021956	11	11613202	C	A	0.0458991	0.00889777	2.49e-07	ADAMTSL4
rs2289125	11	89491285	C	A	0.0445068	0.0090008	7.62e-07	ADAMTSL4
rs7318906	13	73531994	A	G	0.0478517	0.00747113	1.5e-10	ADAMTSL4
rs6746339	2	162230915	T	C	-0.309406	0.0360661	9.58e-18	ADAMTSL4
rs13107325	4	102267552	T	C	-0.104791	0.0139644	6.18e-14	ADAMTSL4
rs3822280	4	113047831	T	C	-0.0376631	0.00756017	6.3e-07	ADAMTSL4
rs72863201	6	49934427	C	T	-0.0578289	0.0116498	6.91e-07	ADAMTSL4
rs2954017	8	125464631	C	T	-0.0635501	0.00735259	5.47e-18	ADAMTSL4
rs56278466	10	17833858	G	T	0.0402059	0.00766615	1.57e-07	ADAMTSL5
rs508196	10	17974944	T	C	-0.0400893	0.00739146	5.84e-08	ADAMTSL5
rs142299549	11	126234680	T	C	-0.113092	0.0224792	4.88e-07	ADAMTSL5
rs1980413	14	73269615	C	G	-0.15128	0.00953955	1.23e-56	ADAMTSL5
rs2332495	19	1488787	G	A	0.228117	0.0129625	2.54e-69	ADAMTSL5
rs171948	19	1503965	T	C	0.253155	0.00803433	1e-200	ADAMTSL5
rs1260326	2	27508073	C	T	0.0395112	0.00745661	1.17e-07	ADAMTSL5
rs13070456	3	24381849	C	A	-0.0483939	0.00913529	1.17e-07	ADAMTSL5
rs4073745	5	177306340	G	A	0.0414106	0.00808435	3.02e-07	ADAMTSL5
rs12207382	6	33734924	T	C	0.0379029	0.00763032	6.79e-07	ADAMTSL5
rs1272041	9	115093228	C	G	-0.0410552	0.0075177	4.73e-08	ADAMTSL5
rs3795720	1	44841834	A	G	0.0399771	0.00806117	7.08e-07	ADCYAP1R1
rs6702978	1	236061269	G	A	0.0471449	0.00780516	1.54e-09	ADCYAP1R1
rs11818360	10	83145355	G	A	0.0555352	0.0106568	1.88e-07	ADCYAP1R1
rs7215492	17	18752174	T	C	-0.0396439	0.00790807	5.36e-07	ADCYAP1R1
rs537766963	18	4363591	T	C	0.160184	0.0323191	7.18e-07	ADCYAP1R1
rs148006250	19	45312475	T	C	-0.170283	0.0346064	8.63e-07	ADCYAP1R1
rs28455632	3	131769674	T	C	-0.0570981	0.0115465	7.61e-07	ADCYAP1R1
rs143921381	5	137413467	C	T	0.219494	0.0431349	3.61e-07	ADCYAP1R1
rs28594470	1	25409808	T	A	-0.0480864	0.00743321	9.86e-11	ADD1
rs1935	10	63168063	G	C	0.0418256	0.00727538	8.98e-09	ADD1
rs2501577	10	110086929	G	A	-0.135124	0.00972911	7.42e-44	ADD1
rs11604127	11	196944	T	C	0.044628	0.00868267	2.75e-07	ADD1
rs4408608	18	39247602	A	G	-0.0364667	0.00733936	6.74e-07	ADD1
rs1354034	3	56815721	C	T	0.0741988	0.00740352	1.22e-23	ADD1
rs79754580	4	2764943	A	C	0.0453627	0.00805376	1.78e-08	ADD1
rs1263339	4	2916247	C	G	-0.17659	0.00933079	7.04e-80	ADD1
rs10075801	5	132341949	G	A	-0.0399928	0.00736194	5.56e-08	ADD1
rs342298	7	106733200	T	C	-0.0364955	0.00729586	5.67e-07	ADD1
rs692502	9	4745645	A	G	0.0370143	0.00739115	5.5e-07	ADD1
rs56278466	10	17833858	G	T	0.0270006	0.00529639	3.43e-07	ADGRB3
rs3740801	11	33072018	G	A	-0.0358889	0.00720825	6.4e-07	ADGRB3
rs7952602	11	126363774	C	G	-0.0465747	0.00740106	3.11e-10	ADGRB3
rs8029570	15	101365761	G	T	-0.0265233	0.00533951	6.79e-07	ADGRB3
rs573431210	17	69280242	G	T	0.117455	0.0157439	8.63e-14	ADGRB3
rs1260326	2	27508073	C	T	0.0339089	0.00515572	4.8e-11	ADGRB3
rs5750826	22	39436108	G	A	-0.0253212	0.00513063	8e-07	ADGRB3
rs9829952	3	25256904	C	G	-0.0317229	0.0063375	5.57e-07	ADGRB3
rs4563439	3	49346346	T	C	-0.0281038	0.00508116	3.18e-08	ADGRB3
rs10434434	4	53405444	C	A	0.0354529	0.00712166	6.42e-07	ADGRB3
rs76183977	4	164037555	G	A	-0.0709655	0.0140883	4.72e-07	ADGRB3
rs140418332	6	68583745	T	C	-0.233879	0.0324612	5.81e-13	ADGRB3
rs12200055	6	68589636	A	C	-0.507116	0.0112678	1e-200	ADGRB3
rs78514750	6	68735886	C	T	1.09876	0.0229408	1e-200	ADGRB3
rs1403923	6	68838314	A	G	-0.391254	0.00973973	1e-200	ADGRB3
rs147902843	6	68882995	A	G	0.506412	0.0475054	1.56e-26	ADGRB3
rs76332952	6	69240326	A	G	-0.36527	0.0365847	1.79e-23	ADGRB3
rs12196744	6	69413668	A	G	-0.248243	0.0452454	4.1e-08	ADGRB3
rs147466572	6	69475508	T	C	-0.279432	0.0294672	2.48e-21	ADGRB3
rs112376926	6	69506756	T	G	0.461543	0.0234934	6.3e-86	ADGRB3
rs142300612	6	69523527	A	C	-0.338607	0.0247432	1.25e-42	ADGRB3
rs78220871	6	69837601	T	C	0.324667	0.0360413	2.09e-19	ADGRB3
rs148858078	6	69919895	G	C	-0.216369	0.0297817	3.73e-13	ADGRB3
rs62493907	8	9587624	A	G	-0.0299544	0.00596858	5.2e-07	ADGRB3
rs72678674	1	43759017	A	G	0.0428755	0.00720718	2.7e-09	ADGRD1
rs469864	1	91076960	C	T	-0.044001	0.00777239	1.5e-08	ADGRD1
rs1223799	1	214174543	C	T	-0.0454136	0.00838994	6.2e-08	ADGRD1
rs903319	1	220812469	C	T	-0.0428688	0.00714871	2.01e-09	ADGRD1
rs112265467	1	247326269	T	G	-0.147335	0.0274809	8.26e-08	ADGRD1
rs56278466	10	17833858	G	T	0.0419213	0.00664719	2.85e-10	ADGRD1
rs1870138	10	80509855	G	A	0.07032	0.00781016	2.18e-19	ADGRD1
rs10832558	11	16216541	G	T	-0.0446107	0.00716079	4.67e-10	ADGRD1
rs174533	11	61781553	A	G	0.0689118	0.00661637	2.11e-25	ADGRD1
rs11045856	12	21197755	G	T	0.0697805	0.00811633	8.15e-18	ADGRD1
rs7966213	12	66104148	C	T	-0.0349757	0.00698565	5.53e-07	ADGRD1
rs79551144	12	130962624	G	A	-0.957406	0.0192108	1e-200	ADGRD1
rs117117232	12	131006913	C	A	-0.405037	0.0360299	2.55e-29	ADGRD1
rs12367096	12	131091094	A	G	0.221649	0.00722986	1e-200	ADGRD1
rs74553400	12	131196431	G	A	-0.246081	0.0163205	2.26e-51	ADGRD1
rs6573778	14	24403003	C	T	-0.0345118	0.00632935	4.96e-08	ADGRD1
rs2239222	14	72545177	G	A	0.0470757	0.00665585	1.52e-12	ADGRD1
rs217181	16	72080103	T	C	-0.0424075	0.00795103	9.63e-08	ADGRD1
rs55714927	17	7176997	T	C	0.0429594	0.00798628	7.48e-08	ADGRD1
rs1801689	17	66214462	C	A	0.144043	0.0184965	6.83e-15	ADGRD1
rs77542162	17	69085137	G	A	0.121645	0.0211146	8.35e-09	ADGRD1
rs143393480	18	58422626	T	G	-0.164876	0.029946	3.68e-08	ADGRD1
rs6857	19	44888997	T	C	-0.0414233	0.00840037	8.18e-07	ADGRD1
rs1260326	2	27508073	C	T	-0.0641726	0.00647285	3.61e-23	ADGRD1
rs7580585	2	64742673	T	C	0.0449282	0.00679506	3.79e-11	ADGRD1
rs6706968	2	120552693	C	A	-0.0512469	0.00642558	1.52e-15	ADGRD1
rs1800961	20	44413724	T	C	-0.164665	0.0178178	2.43e-20	ADGRD1
rs147667955	3	12409339	T	C	-0.224303	0.0381761	4.22e-09	ADGRD1
rs687339	3	136213517	T	C	0.0861836	0.00755846	4.07e-30	ADGRD1
rs16860640	3	186252384	C	T	0.0530049	0.0101823	1.93e-07	ADGRD1
rs75882443	5	9555985	G	A	0.0466955	0.00925413	4.51e-07	ADGRD1
rs6940467	6	31474360	G	A	0.0536665	0.0107383	5.8e-07	ADGRD1
rs396960	6	32223804	A	T	0.0363551	0.00733335	7.14e-07	ADGRD1
rs35332062	7	73597712	A	G	-0.0850843	0.00946042	2.39e-19	ADGRD1
rs12538820	7	99742426	A	G	-0.0543932	0.0100627	6.47e-08	ADGRD1
rs28601761	8	125487789	G	C	-0.0565745	0.00645719	1.93e-18	ADGRD1
rs10776862	9	135997730	G	A	-0.0376253	0.00693471	5.77e-08	ADGRD1
rs4648606	1	1715983	A	G	0.0404952	0.00802026	4.44e-07	ADGRE1
rs2811989	1	23610549	G	T	0.0389311	0.007922	8.91e-07	ADGRE1
rs2099684	1	161530340	G	A	0.0425241	0.00784475	5.94e-08	ADGRE1
rs66586255	10	80429722	T	C	-0.0355246	0.00722488	8.79e-07	ADGRE1
rs4934470	10	89307681	C	T	-0.0586542	0.00808551	4.04e-13	ADGRE1
rs950802	11	60385111	A	G	0.0409973	0.0078639	1.85e-07	ADGRE1
rs36051450	11	123474251	C	T	0.0475168	0.00928116	3.06e-07	ADGRE1
rs112771035	11	126355981	G	C	0.126622	0.0141295	3.2e-19	ADGRE1
rs4601794	11	126375250	G	A	-0.183617	0.0153243	4.41e-33	ADGRE1
rs73031007	11	126446355	C	T	0.0515981	0.00756732	9.2e-12	ADGRE1
rs4759323	12	54077209	A	T	0.0403724	0.00729241	3.09e-08	ADGRE1
rs3184504	12	111446804	C	T	-0.103823	0.00720254	4.18e-47	ADGRE1
rs56959712	12	122703928	T	G	-0.0508338	0.00886268	9.71e-09	ADGRE1
rs72760827	16	3849152	A	G	-0.116906	0.0220403	1.13e-07	ADGRE1
rs34701893	16	12024421	C	T	-0.038968	0.00721408	6.6e-08	ADGRE1
rs77303550	16	72045758	T	C	-0.0482292	0.00913704	1.3e-07	ADGRE1
rs55714927	17	7176997	T	C	0.116598	0.00914984	3.4e-37	ADGRE1
rs2305482	17	39984674	C	A	-0.0501726	0.00724653	4.4e-12	ADGRE1
rs62057151	17	45826476	T	C	-0.0570082	0.00857153	2.91e-11	ADGRE1
rs1292061	17	59833869	G	A	0.0762108	0.00725252	7.92e-26	ADGRE1
rs2725405	17	81246424	C	G	0.053986	0.00730887	1.51e-13	ADGRE1
rs10416912	19	6856621	G	T	0.400133	0.0131095	1e-200	ADGRE1
rs2925672	19	6873070	T	C	0.391568	0.0216693	5.48e-73	ADGRE1
rs79257569	19	6965728	A	G	-0.100203	0.0113218	8.71e-19	ADGRE1
rs9304947	19	7015036	C	T	0.106572	0.00934285	3.87e-30	ADGRE1
rs1260326	2	27508073	C	T	0.0457271	0.00743894	7.9e-10	ADGRE1
rs12616639	2	62302790	G	A	0.0875594	0.00741429	3.48e-32	ADGRE1
rs10200576	2	134133802	G	A	-0.0624097	0.00782229	1.48e-15	ADGRE1
rs1257169	2	134206291	A	C	-0.113217	0.00727913	1.5e-54	ADGRE1
rs7589458	2	202746107	G	A	0.0500831	0.0077242	8.94e-11	ADGRE1
rs4813637	20	3702115	A	G	0.0368986	0.00734705	5.11e-07	ADGRE1
rs347158	3	32423938	G	A	0.0404446	0.00735252	3.78e-08	ADGRE1
rs75580450	3	98583605	A	G	0.0991229	0.0183357	6.44e-08	ADGRE1
rs6440016	3	98655778	A	C	-0.0827643	0.0101669	3.93e-16	ADGRE1
rs56259362	3	186910968	T	C	-0.0485669	0.00938842	2.3e-07	ADGRE1
rs762861	4	3440284	C	G	-0.0426788	0.00845987	4.54e-07	ADGRE1
rs6815814	4	38814717	C	A	0.0660992	0.00910398	3.86e-13	ADGRE1
rs189101496	4	164565180	A	T	-0.0594303	0.0121028	9.09e-07	ADGRE1
rs115216147	5	71369699	A	T	0.118044	0.0148313	1.73e-15	ADGRE1
rs12516382	5	125012376	A	G	-0.0534532	0.00942203	1.4e-08	ADGRE1
rs6556405	5	159208094	C	T	0.0413232	0.00832783	6.97e-07	ADGRE1
rs116446171	6	484453	G	C	0.137464	0.0254389	6.53e-08	ADGRE1
rs597697	6	10538712	G	A	0.0389659	0.00734684	1.13e-07	ADGRE1
rs3094651	6	29881730	A	G	-0.044232	0.00763901	7.03e-09	ADGRE1
rs114968045	6	32699183	C	T	-0.0960199	0.0149042	1.18e-10	ADGRE1
rs117820411	6	95568043	A	G	0.0727257	0.0130258	2.36e-08	ADGRE1
rs2129904	7	130595870	C	T	-0.0665353	0.0102216	7.55e-11	ADGRE1
rs4841133	8	9326154	G	A	-0.0649026	0.0124871	2.02e-07	ADGRE1
rs2667989	8	55966384	C	T	-0.045755	0.00864774	1.22e-07	ADGRE1
rs2511713	8	102565637	G	A	-0.0421604	0.00819196	2.65e-07	ADGRE1
rs2031902	9	33117526	T	C	-0.0456986	0.0074046	6.76e-10	ADGRE1
rs72766630	9	134061669	T	G	-0.0603936	0.00982716	7.97e-10	ADGRE1
rs2185551	1	161692215	T	C	0.0915209	0.0115324	2.09e-15	ADGRE2
rs7900512	10	17609147	C	T	0.0412676	0.00763987	6.6e-08	ADGRE2
rs56278466	10	17833858	G	T	0.119234	0.00745133	1.24e-57	ADGRE2
rs950802	11	60385111	A	G	-0.0595615	0.00764188	6.49e-15	ADGRE2
rs78689694	11	126364925	C	G	-0.0688969	0.0104529	4.36e-11	ADGRE2
rs1866767	11	134404869	T	C	0.0532712	0.0106594	5.81e-07	ADGRE2
rs73119306	12	57433199	G	A	0.0455967	0.00816165	2.31e-08	ADGRE2
rs3184504	12	111446804	C	T	-0.0968046	0.00702181	3.08e-43	ADGRE2
rs148076268	15	44137670	T	A	-0.121891	0.0238456	3.19e-07	ADGRE2
rs3785100	16	67964017	C	T	0.052919	0.0107531	8.6e-07	ADGRE2
rs11076612	16	89689941	T	C	-0.0402234	0.00731201	3.78e-08	ADGRE2
rs55714927	17	7176997	T	C	0.142207	0.00893116	4.42e-57	ADGRE2
rs7224668	17	81261988	C	T	-0.0352026	0.0071296	7.91e-07	ADGRE2
rs3034855	19	14289517	A	G	-0.0898716	0.00895007	1e-23	ADGRE2
rs10404878	19	14395314	C	A	0.25856	0.00832457	1e-200	ADGRE2
rs117132863	19	14497145	T	C	0.123594	0.0160889	1.57e-14	ADGRE2
rs190712692	19	44921921	A	G	0.0824083	0.0166278	7.19e-07	ADGRE2
rs1260326	2	27508073	C	T	0.0538825	0.00723002	9.15e-14	ADGRE2
rs4848370	2	111054088	T	C	-0.0432943	0.00791603	4.52e-08	ADGRE2
rs2460382	2	134256545	A	G	-0.0434055	0.00843831	2.69e-07	ADGRE2
rs2868346	20	45919331	T	C	-0.0504155	0.00817563	6.98e-10	ADGRE2
rs11704551	22	29381515	T	C	-0.0419046	0.00798563	1.54e-07	ADGRE2
rs11721168	3	58422952	A	G	0.0419411	0.00730359	9.33e-09	ADGRE2
rs2470872	3	98969720	T	A	-0.0464244	0.0071565	8.76e-11	ADGRE2
rs10009145	4	99126778	A	G	-0.0350528	0.00708285	7.46e-07	ADGRE2
rs9282761	5	132486532	C	T	-0.0418007	0.0074451	1.97e-08	ADGRE2
rs7041572	9	113323322	C	T	0.0410297	0.0070527	5.97e-09	ADGRE2
rs11244051	9	133253344	A	G	-0.132903	0.02606	3.4e-07	ADGRE2
rs2185551	1	161692215	T	C	0.0927862	0.0116569	1.72e-15	ADGRE5
rs181242111	10	17823665	A	G	0.125337	0.0118808	5.1e-26	ADGRE5
rs56278466	10	17833858	G	T	0.138076	0.00754025	6.65e-75	ADGRE5
rs950802	11	60385111	A	G	-0.0685962	0.00772921	7e-19	ADGRE5
rs78689694	11	126364925	C	G	-0.0699357	0.0105705	3.69e-11	ADGRE5
rs73119306	12	57433199	G	A	0.0515235	0.00826214	4.49e-10	ADGRE5
rs2137537	12	70719307	C	T	-0.0373167	0.00718792	2.09e-07	ADGRE5
rs3184504	12	111446804	C	T	-0.101935	0.0071003	9.71e-47	ADGRE5
rs144637338	15	44083726	C	T	-0.116252	0.0235807	8.22e-07	ADGRE5
rs76609059	16	54373412	T	A	0.125676	0.0193842	8.97e-11	ADGRE5
rs12920315	16	89711353	T	C	-0.0444439	0.007197	6.6e-10	ADGRE5
rs55714927	17	7176997	T	C	0.148812	0.00903168	5.4e-61	ADGRE5
rs2725405	17	81246424	C	G	0.037444	0.00720739	2.04e-07	ADGRE5
rs12974537	19	1074316	T	C	-0.0690501	0.0122547	1.75e-08	ADGRE5
rs139874002	19	14297026	C	G	-0.11304	0.0182072	5.35e-10	ADGRE5
rs142297396	19	14362377	C	T	-0.188014	0.0354128	1.1e-07	ADGRE5
rs58881629	19	14375732	G	A	0.22279	0.0150483	1.36e-49	ADGRE5
rs139113505	19	14388804	T	C	-0.715177	0.0280463	1.98e-143	ADGRE5
rs1260326	2	27508073	C	T	0.0555954	0.00730809	2.8e-14	ADGRE5
rs4848370	2	111054088	T	C	-0.0487795	0.00800386	1.1e-09	ADGRE5
rs2460382	2	134256545	A	G	-0.0501453	0.0085356	4.23e-09	ADGRE5
rs6065904	20	45906012	A	G	0.0645148	0.00862767	7.57e-14	ADGRE5
rs11704551	22	29381515	T	C	-0.0429024	0.00806524	1.04e-07	ADGRE5
rs738409	22	43928847	G	C	0.04229	0.00861297	9.11e-07	ADGRE5
rs62258094	3	58386043	G	T	0.0398228	0.00739744	7.31e-08	ADGRE5
rs34458031	3	99033191	A	G	0.0869612	0.0127276	8.34e-12	ADGRE5
rs10009145	4	99126778	A	G	-0.0363919	0.00714817	3.56e-07	ADGRE5
rs2070726	5	132486046	A	C	-0.0430453	0.00753122	1.09e-08	ADGRE5
rs9461806	6	32742444	T	C	0.0403064	0.00724856	2.69e-08	ADGRE5
rs117820411	6	95568043	A	G	0.0645915	0.0128597	5.09e-07	ADGRE5
rs34062996	8	9802688	A	G	-0.0377181	0.00735807	2.96e-07	ADGRE5
rs6478002	9	113324538	T	C	0.0370052	0.00713147	2.11e-07	ADGRE5
rs12086222	1	156899838	C	G	0.070554	0.0116331	1.32e-09	ADGRF5
rs72765476	1	236067336	T	C	-0.551098	0.0473017	2.28e-31	ADGRF5
rs74891748	1	236110105	T	G	-0.629167	0.0316763	8.6e-88	ADGRF5
rs41315846	1	247549001	C	T	-0.0359364	0.00734288	9.88e-07	ADGRF5
rs77932703	10	19744824	G	A	0.082373	0.0129429	1.96e-10	ADGRF5
rs927826	10	19931917	T	G	0.187118	0.00800072	5.7e-121	ADGRF5
rs7896518	10	63344740	G	A	0.0886295	0.00745279	1.3e-32	ADGRF5
rs835226	12	104670362	T	C	0.0752783	0.0133801	1.84e-08	ADGRF5
rs3184504	12	111446804	C	T	-0.060325	0.00720538	5.65e-17	ADGRF5
rs9578307	13	20701944	G	A	0.0656817	0.0131278	5.64e-07	ADGRF5
rs61978213	14	70187041	A	G	0.0894875	0.0180888	7.53e-07	ADGRF5
rs7172696	15	101451106	G	A	-0.0411406	0.00804258	3.13e-07	ADGRF5
rs11075045	16	8940859	G	A	0.0556582	0.00946593	4.11e-09	ADGRF5
rs12445050	16	81837364	T	C	0.0879406	0.010468	4.43e-17	ADGRF5
rs892090	19	55027704	G	T	0.123314	0.00979841	2.55e-36	ADGRF5
rs13025787	2	136339524	T	C	0.0384223	0.00756174	3.75e-07	ADGRF5
rs7585866	2	191831529	G	A	0.0381344	0.00756215	4.59e-07	ADGRF5
rs13412535	2	224010157	A	G	-0.0596094	0.00860875	4.38e-12	ADGRF5
rs1033549	20	19291296	T	G	0.0525606	0.00747702	2.07e-12	ADGRF5
rs7618405	3	18209017	A	C	-0.0520762	0.0090127	7.56e-09	ADGRF5
rs11719450	3	58471084	T	C	0.0735367	0.00754763	1.98e-22	ADGRF5
rs73193734	3	124643983	G	C	-0.147132	0.0281828	1.78e-07	ADGRF5
rs7686702	4	101848946	T	A	-0.0489406	0.0073045	2.08e-11	ADGRF5
rs34957	5	72908197	G	A	0.049759	0.00727144	7.75e-12	ADGRF5
rs9266095	6	31353550	G	A	-0.0454446	0.0089277	3.58e-07	ADGRF5
rs2516430	6	31458842	T	C	0.0428492	0.0073456	5.43e-09	ADGRF5
rs13201810	6	70624610	C	T	-0.0438661	0.0079279	3.15e-08	ADGRF5
rs17154130	7	80600168	C	T	0.0925005	0.0150316	7.57e-10	ADGRF5
rs342299	7	106733272	T	C	-0.062787	0.00727716	6.25e-18	ADGRF5
rs16878953	8	32186909	G	A	-0.049787	0.0100942	8.13e-07	ADGRF5
rs76803294	8	73369427	T	G	0.0695985	0.0134423	2.25e-07	ADGRF5
rs6993770	8	105569300	T	A	-0.0514541	0.00799787	1.25e-10	ADGRF5
rs7849565	9	4763526	C	G	-0.0393233	0.00789318	6.3e-07	ADGRF5
rs9410223	9	88827151	A	G	-0.0762714	0.0150698	4.17e-07	ADGRF5
rs10820606	9	96430637	C	A	-0.0461068	0.00875102	1.37e-07	ADGRF5
rs61751937	9	110549951	C	G	0.111629	0.0216871	2.64e-07	ADGRF5
rs60757417	9	132989049	G	C	-0.0816846	0.015316	9.64e-08	ADGRF5
rs37470	1	43812276	C	G	0.0449773	0.00744582	1.54e-09	ADGRG1
rs10875368	1	101296562	A	G	0.0498886	0.00795107	3.51e-10	ADGRG1
rs56278466	10	17833858	G	T	0.133074	0.0075682	3.31e-69	ADGRG1
rs1757218	10	18217812	C	G	0.0634372	0.0102617	6.33e-10	ADGRG1
rs1782645	10	79288854	T	C	0.0390711	0.00729623	8.56e-08	ADGRG1
rs6592302	11	86622392	T	A	-0.0642981	0.00780632	1.77e-16	ADGRG1
rs3016275	11	128197509	T	C	-0.045466	0.00753985	1.64e-09	ADGRG1
rs35969688	12	53399425	A	G	0.0478274	0.0094138	3.76e-07	ADGRG1
rs3184504	12	111446804	C	T	-0.0800973	0.00712592	2.59e-29	ADGRG1
rs28929474	14	94378610	T	C	0.159599	0.0251197	2.1e-10	ADGRG1
rs71383252	16	57605741	A	G	-0.119513	0.0187476	1.83e-10	ADGRG1
rs733464	16	57648363	T	C	0.0710144	0.00735137	4.46e-22	ADGRG1
rs77829168	17	2094182	T	C	-0.122413	0.0238514	2.86e-07	ADGRG1
rs55714927	17	7176997	T	C	0.0664608	0.00905256	2.11e-13	ADGRG1
rs2725405	17	81246424	C	G	0.0420283	0.00721994	5.84e-09	ADGRG1
rs62161501	2	110986489	A	G	0.0421954	0.00849012	6.7e-07	ADGRG1
rs1047891	2	210675783	A	C	0.0629173	0.0077501	4.73e-16	ADGRG1
rs738409	22	43928847	G	C	0.0600057	0.00864322	3.85e-12	ADGRG1
rs11716580	3	58242968	C	G	-0.0671709	0.0134765	6.22e-07	ADGRG1
rs10935473	3	98698056	T	G	-0.0789649	0.00722944	8.98e-28	ADGRG1
rs6779146	3	136188371	C	T	-0.0458019	0.00855266	8.54e-08	ADGRG1
rs58759191	5	136060138	G	C	-0.0508776	0.00719393	1.52e-12	ADGRG1
rs12685561	9	4689447	G	A	-0.0806063	0.0146418	3.69e-08	ADGRG1
rs7865362	9	33117967	T	C	-0.0454966	0.00754166	1.61e-09	ADGRG1
rs10818768	9	122947044	G	A	-0.0366367	0.00715747	3.08e-07	ADGRG1
rs12745935	1	59178410	G	A	0.0714198	0.00756203	3.57e-21	ADGRG2
rs7896518	10	63344740	G	A	0.0393968	0.00703674	2.16e-08	ADGRG2
rs2727258	11	61922711	A	G	0.0406345	0.00691018	4.09e-09	ADGRG2
rs685903	11	126317942	C	T	0.0389094	0.00690971	1.79e-08	ADGRG2
rs74612335	11	126368738	C	T	-0.0899485	0.0101768	9.69e-19	ADGRG2
rs11068815	12	118080996	A	T	-0.121569	0.0199033	1.01e-09	ADGRG2
rs1896441	15	70540453	A	G	-0.0499441	0.0101345	8.3e-07	ADGRG2
rs62051384	16	69825279	T	C	-0.0384977	0.00711256	6.21e-08	ADGRG2
rs12449427	17	7269960	C	G	0.0606761	0.00795669	2.43e-14	ADGRG2
rs112502880	17	69138665	C	T	0.089412	0.0165309	6.35e-08	ADGRG2
rs79189501	17	82827100	G	A	0.107401	0.0218342	8.7e-07	ADGRG2
rs1875406	2	47835645	A	G	-0.0527533	0.00983098	8.05e-08	ADGRG2
rs139681502	2	95381215	G	C	-0.137107	0.0262818	1.82e-07	ADGRG2
rs11678190	2	186695581	C	A	-0.0371486	0.00754997	8.64e-07	ADGRG2
rs11927405	3	98684125	T	C	-0.0383109	0.00695907	3.69e-08	ADGRG2
rs1055213	3	100746432	T	C	-0.0483841	0.00881934	4.11e-08	ADGRG2
rs74288770	3	194998342	A	G	-0.10032	0.0188347	1e-07	ADGRG2
rs13107325	4	102267552	T	C	0.0980224	0.0131173	7.85e-14	ADGRG2
rs115912456	5	83519339	G	A	-0.147896	0.0174138	2.01e-17	ADGRG2
rs10903252	5	180306934	C	T	-0.0359547	0.00707377	3.72e-07	ADGRG2
rs13191810	6	32619054	T	C	0.0456691	0.00744225	8.44e-10	ADGRG2
rs6979606	7	7218872	T	C	-0.0411877	0.00715506	8.59e-09	ADGRG2
rs17156942	7	28627668	G	A	0.0782199	0.0146141	8.68e-08	ADGRG2
rs146482703	8	18125190	C	T	0.0909216	0.0184788	8.64e-07	ADGRG2
rs7836422	8	38992502	T	C	0.0768696	0.00706503	1.43e-27	ADGRG2
rs1137654	9	98808054	T	A	0.0795436	0.0122285	7.78e-11	ADGRG2
rs1031101	10	52773600	G	A	-0.165276	0.0111019	3.99e-50	ADGRV1
rs78397460	19	47247899	G	T	0.0893838	0.0180256	7.1e-07	ADGRV1
rs17047504	1	218203154	G	T	0.184376	0.0352017	1.63e-07	ADH1B
rs10883451	10	100164661	C	T	-0.0528295	0.00735017	6.6e-13	ADH1B
rs174600	11	61854755	C	T	-0.0418309	0.0078395	9.51e-08	ADH1B
rs4753124	11	94090069	G	C	-0.0639344	0.0119363	8.49e-08	ADH1B
rs28929474	14	94378610	T	C	0.164967	0.0259183	1.95e-10	ADH1B
rs73001065	19	19349732	C	G	0.0815863	0.0144729	1.73e-08	ADH1B
rs10405357	19	54255803	C	T	-0.0686841	0.00749211	4.84e-20	ADH1B
rs3747207	22	43928975	A	G	0.0983737	0.00896359	5.05e-28	ADH1B
rs78051445	3	115401307	T	C	-0.173992	0.0330968	1.46e-07	ADH1B
rs190913833	4	99113626	A	T	-0.333097	0.0419904	2.14e-15	ADH1B
rs1229984	4	99318162	C	T	0.24475	0.0248901	8.1e-23	ADH1B
rs34086521	5	81947067	C	T	0.107501	0.0213299	4.66e-07	ADH1B
rs13218745	6	64205860	T	G	-0.154494	0.0313247	8.14e-07	ADH1B
rs346618	8	72333369	T	A	-0.056913	0.0114884	7.27e-07	ADH1B
rs16906486	8	79079274	G	A	0.0548571	0.0102791	9.46e-08	ADH1B
rs112875651	8	125494452	A	G	-0.0513635	0.00766712	2.1e-11	ADH1B
rs4979373	9	114382224	T	C	-0.0713827	0.00745381	1e-21	ADH1B
rs4926866	1	50651452	G	A	0.0575477	0.0117424	9.54e-07	ADH4
rs10998645	10	69215178	C	T	0.0393128	0.00754758	1.9e-07	ADH4
rs10883451	10	100164661	C	T	-0.0506692	0.00723685	2.53e-12	ADH4
rs151308041	11	1681063	A	T	-0.19828	0.0393076	4.55e-07	ADH4
rs4753124	11	94090069	G	C	-0.0766157	0.0117402	6.76e-11	ADH4
rs12826643	12	100388110	T	C	0.036427	0.00738568	8.13e-07	ADH4
rs696	14	35401887	T	C	0.0380883	0.00754489	4.46e-07	ADH4
rs28929474	14	94378610	T	C	0.134121	0.0254597	1.38e-07	ADH4
rs9788910	16	3064471	G	C	0.0367762	0.00731825	5.03e-07	ADH4
rs4940394	18	58466864	C	T	-0.0494986	0.00870262	1.29e-08	ADH4
rs73001065	19	19349732	C	G	0.0832806	0.0142188	4.71e-09	ADH4
rs10405357	19	54255803	C	T	-0.0460587	0.00736797	4.07e-10	ADH4
rs2229458	2	240464900	T	C	-0.0366333	0.00740338	7.49e-07	ADH4
rs6088394	20	34087707	G	A	0.0419169	0.00792814	1.24e-07	ADH4
rs3747207	22	43928975	A	G	0.102425	0.00881031	3.06e-31	ADH4
rs1800759	4	99144358	G	T	0.130044	0.00746332	5.38e-68	ADH4
rs77063716	6	29011999	A	T	-0.136812	0.0248212	3.55e-08	ADH4
rs11965964	6	33052827	T	C	0.132707	0.0256821	2.37e-07	ADH4
rs112875651	8	125494452	A	G	-0.0559307	0.00753797	1.17e-13	ADH4
rs10733608	9	114386150	T	G	-0.0634242	0.00734895	6.12e-18	ADH4
rs146777460	1	11820711	G	A	0.045112	0.0087408	2.46e-07	ADIPOQ
rs72657272	1	30934467	T	C	0.0630851	0.00895286	1.84e-12	ADIPOQ
rs333947	1	109928142	A	G	-0.0526928	0.00890288	3.25e-09	ADIPOQ
rs61838776	1	219445222	A	C	-0.051262	0.00855814	2.1e-09	ADIPOQ
rs2429511	10	114041494	C	T	0.0360455	0.00634916	1.37e-08	ADIPOQ
rs61884005	11	14381384	G	C	0.0630165	0.00973971	9.8e-11	ADIPOQ
rs76895963	12	4275678	G	T	0.161611	0.0245967	5.02e-11	ADIPOQ
rs7134375	12	20320824	A	C	0.0648081	0.00643267	7.14e-24	ADIPOQ
rs10841520	12	20433461	T	C	0.0444421	0.00798451	2.61e-08	ADIPOQ
rs10783790	12	56537494	T	C	-0.0352349	0.00656459	7.99e-08	ADIPOQ
rs12423420	12	122453919	A	G	0.049187	0.00721591	9.33e-12	ADIPOQ
rs10773000	12	123251537	T	G	0.0393013	0.00676844	6.38e-09	ADIPOQ
rs4930724	12	123939270	C	T	0.0595562	0.00674331	1.03e-18	ADIPOQ
rs825453	12	124024211	T	A	-0.0655751	0.0065041	6.63e-24	ADIPOQ
rs151001052	13	104963323	A	G	-0.179794	0.0343354	1.64e-07	ADIPOQ
rs7157417	14	24403791	C	T	0.046777	0.00947416	7.92e-07	ADIPOQ
rs2925979	16	81501185	C	T	0.0920183	0.00695484	5.82e-40	ADIPOQ
rs12922394	16	82638722	T	C	-0.109719	0.0139285	3.35e-15	ADIPOQ
rs10048109	16	83167056	G	A	-0.0384822	0.0065338	3.87e-09	ADIPOQ
rs12599874	16	83562529	C	T	-0.0401925	0.00655767	8.84e-10	ADIPOQ
rs5418	17	7281773	A	G	-0.0422506	0.00642164	4.72e-11	ADIPOQ
rs2228253	17	47916678	T	C	0.0335558	0.00642337	1.75e-07	ADIPOQ
rs12454712	18	63178651	C	T	0.0330701	0.00654666	4.38e-07	ADIPOQ
rs117533700	19	13065914	T	C	-0.107158	0.0167615	1.63e-10	ADIPOQ
rs10422861	19	33403940	T	C	0.0649872	0.00674286	5.53e-22	ADIPOQ
rs10181515	2	226154745	T	C	0.0427475	0.00766177	2.41e-08	ADIPOQ
rs1160102	20	7336187	C	T	0.0861808	0.0162119	1.06e-07	ADIPOQ
rs17733118	20	52588695	T	C	-0.0393714	0.00763833	2.54e-07	ADIPOQ
rs8126001	20	64080106	T	C	0.0339488	0.00635956	9.39e-08	ADIPOQ
rs66782572	3	52533601	G	A	0.0588775	0.00651947	1.7e-19	ADIPOQ
rs76967933	3	132688051	A	C	-0.0578546	0.0115559	5.54e-07	ADIPOQ
rs13322435	3	157077679	G	A	0.0347402	0.00668386	2.02e-07	ADIPOQ
rs9290835	3	186600997	A	T	-0.0396789	0.00728711	5.18e-08	ADIPOQ
rs56211697	3	186712208	T	C	0.12772	0.010033	4.03e-37	ADIPOQ
rs77772668	3	186829071	T	C	-0.145515	0.0242551	1.98e-09	ADIPOQ
rs143257534	3	186834099	T	C	-0.614829	0.0204078	2.14e-199	ADIPOQ
rs17366653	3	186853027	C	T	-0.637287	0.0361774	1.87e-69	ADIPOQ
rs28609134	4	55368150	C	G	-0.0365773	0.00697658	1.58e-07	ADIPOQ
rs3822076	4	88788757	A	T	-0.0375404	0.00638084	4.02e-09	ADIPOQ
rs4334836	5	54005005	C	T	-0.0449271	0.00726296	6.18e-10	ADIPOQ
rs10050393	5	158491938	C	T	0.0319583	0.00642341	6.52e-07	ADIPOQ
rs2523579	6	31360740	C	T	-0.0360099	0.00658999	4.65e-08	ADIPOQ
rs998584	6	43790159	A	C	-0.0334308	0.00635388	1.43e-07	ADIPOQ
rs592423	6	139519556	C	A	0.0339914	0.00640174	1.1e-07	ADIPOQ
rs607335	6	153144095	A	C	0.036274	0.00639222	1.39e-08	ADIPOQ
rs4709746	6	163711969	T	C	0.0468506	0.00935084	5.43e-07	ADIPOQ
rs2714875	7	17886352	G	A	-0.0344199	0.00635231	6.01e-08	ADIPOQ
rs10235679	7	77702168	A	G	0.0321246	0.00637394	4.66e-07	ADIPOQ
rs4339549	7	150590089	G	A	-0.0469054	0.007648	8.62e-10	ADIPOQ
rs7464506	8	12766916	T	A	-0.0355197	0.00676165	1.5e-07	ADIPOQ
rs146492163	8	71474159	T	G	-0.0985293	0.0187414	1.46e-07	ADIPOQ
rs7859344	9	129086103	A	T	-0.0480046	0.00697936	6.07e-12	ADIPOQ
rs7028191	9	134225650	T	C	-0.03196	0.00641188	6.21e-07	ADIPOQ
rs78444298	1	184702964	A	G	0.126314	0.0255326	7.53e-07	ADM
rs4881540	10	908336	T	C	-0.0519653	0.0104209	6.14e-07	ADM
rs2027238	10	24005138	T	C	-0.0387815	0.00733006	1.22e-07	ADM
rs7926490	11	10336912	T	C	0.159271	0.00705197	6.04e-113	ADM
rs7949802	11	113511110	T	C	-0.0369053	0.00714739	2.42e-07	ADM
rs11619826	13	112706455	A	G	-0.0438282	0.00838492	1.72e-07	ADM
rs7203642	16	20355808	G	A	-0.0481849	0.00889174	5.99e-08	ADM
rs9972653	16	53780451	T	G	0.0361902	0.00715157	4.18e-07	ADM
rs76713183	2	162197789	C	A	0.118689	0.0238967	6.81e-07	ADM
rs12469704	2	162255785	T	A	-0.503819	0.0350548	7.72e-47	ADM
rs13146355	4	76490987	A	G	0.0395983	0.00697059	1.34e-08	ADM
rs145516756	5	109116544	G	C	0.174336	0.0353314	8.04e-07	ADM
rs2524119	6	31261627	C	T	-0.0470706	0.00705391	2.51e-11	ADM
rs4582450	7	16893302	C	T	0.104099	0.0203544	3.15e-07	ADM
rs62481309	7	155843531	C	T	-0.0406729	0.00760886	9.02e-08	ADM
rs12203592	6	396321	T	C	0.0503109	0.00962249	1.71e-07	ADRA2A
rs928976	6	33081434	T	C	0.0435199	0.00834183	1.82e-07	ADRA2A
rs10822143	10	63128096	T	C	0.03513	0.00552051	1.97e-10	AFAP1
rs36051450	11	123474251	C	T	-0.0484267	0.00707332	7.57e-12	AFAP1
rs10129287	14	106536523	G	A	-0.0387801	0.00624271	5.23e-10	AFAP1
rs1568391	16	85921698	T	G	-0.0277624	0.00555372	5.77e-07	AFAP1
rs75517831	2	8945497	A	T	-0.0786471	0.0155846	4.5e-07	AFAP1
rs6732545	2	52026302	C	T	0.0298096	0.00608612	9.68e-07	AFAP1
rs1354034	3	56815721	C	T	0.0278097	0.00562418	7.63e-07	AFAP1
rs2981030	3	128430747	G	A	0.0311148	0.00617505	4.68e-07	AFAP1
rs56248498	4	7480161	G	A	-0.0473791	0.00786673	1.72e-09	AFAP1
rs4689835	4	7716807	G	T	-0.354941	0.0113352	1e-200	AFAP1
rs2301745	4	7726931	T	C	0.306898	0.00768947	1e-200	AFAP1
rs62636596	4	7768886	T	C	-0.319533	0.0322276	3.59e-23	AFAP1
rs2292735	4	7966148	A	G	-0.244277	0.0146539	2.17e-62	AFAP1
rs201236422	4	8044693	C	A	-0.0742946	0.00841651	1.07e-18	AFAP1
rs17429731	5	16754940	T	C	0.0486289	0.00918727	1.2e-07	AFAP1
rs6891054	5	125005010	G	A	0.0327836	0.00650169	4.6e-07	AFAP1
rs6925032	6	90298308	A	C	0.0309251	0.00581126	1.03e-07	AFAP1
rs6656611	1	16189310	C	T	0.0466194	0.00757454	7.52e-10	AFM
rs10832570	11	16227964	G	A	0.0491021	0.00761489	1.13e-10	AFM
rs10083142	12	24045633	T	A	0.157025	0.0199862	3.94e-15	AFM
rs117927148	12	57247024	T	C	0.0781569	0.0138297	1.59e-08	AFM
rs200293726	16	79720543	T	A	-0.0698443	0.00810521	6.86e-18	AFM
rs429358	19	44908684	C	T	-0.0601321	0.010296	5.21e-09	AFM
rs140893297	20	44647728	T	C	0.124134	0.024983	6.74e-07	AFM
rs148208728	4	73427413	C	T	0.2201	0.0247411	5.78e-19	AFM
rs13132712	4	73480179	C	T	0.336036	0.0262031	1.2e-37	AFM
rs79784350	4	73652078	C	G	0.0999138	0.0184267	5.89e-08	AFM
rs28650790	5	56565637	T	C	0.0471094	0.00944658	6.13e-07	AFM
rs3099840	6	31462944	G	A	-0.053933	0.00937148	8.66e-09	AFM
rs4483073	7	154252963	A	C	0.0453763	0.00791108	9.71e-09	AFM
rs6671165	1	16189615	A	G	0.0408647	0.00702817	6.08e-09	AFP
rs6686497	1	23483867	C	T	0.0469646	0.00745445	2.97e-10	AFP
rs12059956	1	171094121	A	G	-0.0472901	0.00698258	1.27e-11	AFP
rs11577968	1	209671943	C	G	0.0434637	0.008325	1.78e-07	AFP
rs4149909	1	241860596	G	A	-0.143716	0.0196607	2.67e-13	AFP
rs7073746	10	63144311	G	A	-0.0492161	0.00689862	9.74e-13	AFP
rs7906309	10	68485387	G	A	-0.0564229	0.0102085	3.26e-08	AFP
rs4934310	10	87169866	A	G	0.0602313	0.00964636	4.27e-10	AFP
rs10883567	10	100996022	C	T	-0.0599511	0.00688146	2.99e-18	AFP
rs12796943	11	1644078	T	C	-0.0874666	0.00939826	1.32e-20	AFP
rs3842761	11	2158122	C	G	0.0442782	0.00824457	7.85e-08	AFP
rs11236173	11	74621217	G	A	0.0384606	0.00744489	2.39e-07	AFP
rs141379009	11	108278480	G	T	0.157695	0.021363	1.56e-13	AFP
rs10891050	11	110069541	A	G	-0.0467414	0.00828538	1.69e-08	AFP
rs898158	12	69930439	G	A	0.0468444	0.00749191	4.04e-10	AFP
rs7310409	12	120987058	G	A	0.1052	0.00712617	2.56e-49	AFP
rs9568221	13	49488812	G	A	-0.0753964	0.0128065	3.92e-09	AFP
rs9558917	13	106980570	G	A	-0.0374267	0.00701675	9.61e-08	AFP
rs11621792	14	24402720	T	C	0.0441626	0.00694643	2.05e-10	AFP
rs55981844	14	96467077	C	T	0.0402685	0.00750779	8.16e-08	AFP
rs560191	15	43475576	C	G	0.121614	0.00750799	5.22e-59	AFP
rs56369308	15	63500058	C	T	0.0539114	0.00727354	1.24e-13	AFP
rs5742915	15	74044292	C	T	-0.0438211	0.00694258	2.76e-10	AFP
rs9888780	16	7418865	C	G	-0.0484381	0.00939061	2.49e-07	AFP
rs17689024	16	79706081	C	G	-0.052761	0.00743477	1.28e-12	AFP
rs2779210	17	15971833	A	G	-0.0385209	0.00696613	3.21e-08	AFP
rs9754	17	35934827	G	A	0.0901089	0.0098104	4.11e-20	AFP
rs4794048	17	47685707	C	A	0.0708755	0.00691205	1.14e-24	AFP
rs12949906	17	49769717	G	A	-0.0566363	0.00725703	5.98e-15	AFP
rs1801689	17	66214462	C	A	-0.169668	0.0201751	4.11e-17	AFP
rs35103294	17	75814856	T	C	0.049683	0.00716376	4.05e-12	AFP
rs123698	19	807442	C	G	0.0388981	0.0070322	3.18e-08	AFP
rs708686	19	5840608	T	C	0.0393638	0.0077875	4.31e-07	AFP
rs2548458	19	48706068	T	C	-0.0493627	0.00703709	2.31e-12	AFP
rs56059649	2	17063986	A	T	0.0512877	0.00760696	1.56e-11	AFP
rs58512298	2	17654507	C	T	-0.409343	0.0133201	1e-200	AFP
rs2078106	2	17877126	A	G	0.0359658	0.00711342	4.28e-07	AFP
rs839421	2	67428284	T	A	-0.0866783	0.00780239	1.13e-28	AFP
rs2161037	2	169036909	A	G	0.0438	0.00718359	1.08e-09	AFP
rs73987732	2	214879311	A	G	0.0834602	0.015597	8.74e-08	AFP
rs6728689	2	230545045	A	G	0.0512652	0.00930978	3.66e-08	AFP
rs6116934	20	5751157	C	T	0.0951179	0.00840983	1.17e-29	AFP
rs1294699	20	5814486	G	C	-0.0507372	0.00828869	9.28e-10	AFP
rs41282138	20	5863306	A	G	0.114652	0.0184163	4.8e-10	AFP
rs113844904	20	32248805	T	C	-0.0693285	0.00948115	2.63e-13	AFP
rs4822983	22	28719078	T	C	-0.0370721	0.00733226	4.28e-07	AFP
rs2294915	22	43945024	T	C	-0.055576	0.00815536	9.45e-12	AFP
rs6007594	22	45332489	A	G	0.130655	0.00786092	4.93e-62	AFP
rs784504	3	39153769	C	G	0.0472068	0.00885519	9.77e-08	AFP
rs62280667	3	101365760	C	T	-0.12908	0.00733195	2.25e-69	AFP
rs13087012	3	115131943	T	G	0.04246	0.0074372	1.14e-08	AFP
rs812249	3	149068321	T	C	-0.0413261	0.00748946	3.43e-08	AFP
rs4630973	3	196434689	A	T	0.0412368	0.0080275	2.79e-07	AFP
rs59950280	4	3450618	A	G	0.0918872	0.00755071	4.53e-34	AFP
rs111746167	4	3482951	C	G	-0.0890339	0.016447	6.18e-08	AFP
rs7692425	4	73193271	A	T	-0.27447	0.0179462	8.38e-53	AFP
rs12506899	4	73453566	G	T	-0.186045	0.00713109	4.83e-150	AFP
rs62305321	4	83533188	C	A	0.0359028	0.00701086	3.04e-07	AFP
rs3775228	4	87064014	T	C	0.0450774	0.00716258	3.1e-10	AFP
rs2602874	4	99118245	T	A	-0.0721176	0.0070523	1.51e-24	AFP
rs378712	5	65559126	A	C	-0.0416143	0.00694972	2.13e-09	AFP
rs13153862	5	176307545	T	C	0.0434249	0.00704463	7.08e-10	AFP
rs389007	5	176985003	C	T	0.0371929	0.00690582	7.21e-08	AFP
rs3130541	6	31261264	A	C	-0.0498838	0.00839477	2.81e-09	AFP
rs1319012	6	41884878	A	T	0.0869823	0.0135273	1.27e-10	AFP
rs6941212	6	42948182	C	T	-0.0451813	0.00694422	7.7e-11	AFP
rs2608639	6	52767415	T	C	0.0360774	0.00721975	5.82e-07	AFP
rs72868608	6	57187131	C	T	-0.0596873	0.00983331	1.28e-09	AFP
rs12212507	6	160650950	A	G	-0.0729108	0.0146175	6.1e-07	AFP
rs3829898	7	1529575	A	G	-0.0339876	0.00692037	9.05e-07	AFP
rs148491769	7	130148319	T	A	0.120234	0.023968	5.26e-07	AFP
rs62501135	8	23231695	A	G	-0.054293	0.00854403	2.09e-10	AFP
rs820503	9	6667928	A	C	0.050629	0.00998763	4e-07	AFP
rs6559365	9	89594364	A	G	0.0342164	0.00691882	7.6e-07	AFP
rs62576492	9	132343321	G	A	0.133775	0.0112176	8.73e-33	AFP
rs10831847	11	12543305	G	A	0.0540414	0.0108202	5.9e-07	AGBL2
rs142319155	19	17654913	T	A	0.315911	0.063927	7.74e-07	AGBL2
rs148868508	22	37884185	G	T	0.157514	0.0311105	4.13e-07	AGBL2
rs2788092	1	3077976	G	C	-0.0435169	0.00834693	1.85e-07	AGER
rs66906568	1	10662242	C	T	-0.0777151	0.00807972	6.68e-22	AGER
rs10753239	1	30889377	C	T	-0.0546796	0.00748239	2.72e-13	AGER
rs10874746	1	92858414	C	T	0.0432693	0.00769057	1.84e-08	AGER
rs1289813	1	117279693	A	G	0.0545986	0.00816219	2.24e-11	AGER
rs115842852	1	117342995	A	G	-0.140704	0.025703	4.39e-08	AGER
rs6676150	1	155151361	C	G	-0.0428857	0.00753206	1.24e-08	AGER
rs6664840	1	175159590	G	A	-0.0770814	0.00733645	8.05e-26	AGER
rs56278466	10	17833858	G	T	0.0435232	0.00768712	1.5e-08	AGER
rs2487928	10	30034963	A	G	-0.0557915	0.00734011	2.94e-14	AGER
rs1238357	10	69508533	T	C	0.0487521	0.00732383	2.8e-11	AGER
rs12411484	10	80504198	G	A	0.0589224	0.0103833	1.39e-08	AGER
rs7950422	11	102237014	A	G	-0.0445368	0.00817947	5.18e-08	AGER
rs35393359	12	514290	T	C	-0.0919411	0.00970075	2.6e-21	AGER
rs149363012	12	561354	T	C	0.123464	0.0227696	5.88e-08	AGER
rs10845030	12	10078736	T	C	0.0527794	0.0075642	3e-12	AGER
rs6538677	12	95860750	G	A	-0.0422515	0.00750958	1.84e-08	AGER
rs10774625	12	111472415	G	A	0.0383978	0.00725626	1.21e-07	AGER
rs1896354	12	114935160	G	A	0.0666356	0.00734782	1.2e-19	AGER
rs55703124	13	109270326	C	T	-0.064043	0.00829866	1.19e-14	AGER
rs4981927	14	31894786	C	T	-0.0368286	0.00746544	8.09e-07	AGER
rs9944163	14	104034493	T	G	0.047925	0.00769904	4.82e-10	AGER
rs11632399	15	41530125	T	C	-0.0439101	0.00729174	1.72e-09	AGER
rs10152355	15	58378979	A	C	0.0652792	0.00763273	1.2e-17	AGER
rs28656084	15	71395057	T	C	-0.0476186	0.00964583	7.95e-07	AGER
rs68020185	15	75106579	C	T	0.0473936	0.00889804	1e-07	AGER
rs34262842	16	20344489	G	A	-0.0677164	0.00982859	5.59e-12	AGER
rs11640085	16	48510920	T	C	0.0704408	0.0122639	9.26e-09	AGER
rs12923138	16	67199363	C	A	-0.0390932	0.00742909	1.42e-07	AGER
rs12445830	16	70468590	A	G	-0.0656112	0.0128417	3.23e-07	AGER
rs35391225	17	38514577	A	G	-0.0587351	0.00977029	1.84e-09	AGER
rs34490194	17	48571382	T	C	0.0502614	0.00933412	7.26e-08	AGER
rs2445852	19	16282165	G	A	-0.0428362	0.00762036	1.9e-08	AGER
rs6510175	19	30689843	T	G	-0.0629255	0.0090157	2.96e-12	AGER
rs1433122	19	32100794	C	T	0.0556175	0.00796771	2.94e-12	AGER
rs117724779	19	38513060	A	G	0.114963	0.0215317	9.33e-08	AGER
rs7603490	2	42070232	C	T	0.0422322	0.00852397	7.25e-07	AGER
rs778150	2	61381237	T	C	-0.0469871	0.00730426	1.25e-10	AGER
rs34186168	2	171525444	C	T	0.0372488	0.00760112	9.56e-07	AGER
rs55663792	20	17814303	T	A	0.0674726	0.0129146	1.75e-07	AGER
rs71327835	20	56606913	A	C	0.0693377	0.0105865	5.77e-11	AGER
rs719500	21	17663826	A	G	-0.0392824	0.00758265	2.21e-07	AGER
rs4320024	22	30313202	T	C	0.069261	0.0117305	3.54e-09	AGER
rs9846767	3	14838929	T	C	0.0854019	0.0136792	4.29e-10	AGER
rs2651064	3	192948881	T	C	-0.0370913	0.00729326	3.66e-07	AGER
rs2137715	4	89089309	C	A	0.0646606	0.00745722	4.29e-18	AGER
rs13106878	4	119225228	A	T	-0.0619936	0.0109619	1.56e-08	AGER
rs1110350	5	52893218	G	A	0.0470998	0.00825924	1.18e-08	AGER
rs246521	5	52975195	A	C	0.0768435	0.00785145	1.28e-22	AGER
rs25884	5	132076545	G	A	0.0484154	0.00899443	7.33e-08	AGER
rs13171669	5	149221680	G	A	0.0451016	0.00738874	1.03e-09	AGER
rs2076295	6	7562999	G	T	0.046639	0.00744234	3.69e-10	AGER
rs196034	6	22043580	G	A	-0.0373268	0.00747779	5.99e-07	AGER
rs9266050	6	31351268	A	G	-0.122548	0.0122577	1.56e-23	AGER
rs204993	6	32187804	G	A	-0.16995	0.00787367	2.51e-103	AGER
rs6912283	6	43396756	A	G	0.0386718	0.00739872	1.72e-07	AGER
rs9403391	6	142493854	T	C	0.132932	0.0214701	5.96e-10	AGER
rs77662041	7	151882291	A	G	0.080567	0.0149889	7.65e-08	AGER
rs73208935	8	13160639	T	C	0.0492525	0.00966382	3.46e-07	AGER
rs7823498	8	32546055	T	C	0.0730431	0.00878293	9.06e-17	AGER
rs66830395	8	94619238	C	T	-0.0364064	0.00743458	9.74e-07	AGER
rs11243421	9	131550651	C	T	-0.130812	0.00736474	1.39e-70	AGER
rs113489222	1	153890950	T	G	0.043139	0.00847516	3.58e-07	AGR2
rs28633254	11	1199373	C	T	-0.0565494	0.00773939	2.74e-13	AGR2
rs936345	16	17279160	A	G	-0.0394862	0.00768526	2.78e-07	AGR2
rs601338	19	48703417	A	G	-0.0586222	0.00765872	1.94e-14	AGR2
rs6449494	5	60760762	T	C	0.0427982	0.00853807	5.37e-07	AGR2
rs9373548	6	148080646	T	G	0.048618	0.00920852	1.29e-07	AGR2
rs7807123	7	16816925	T	C	0.107279	0.00773052	8.68e-44	AGR2
rs78791791	7	31435575	A	G	0.132353	0.0263098	4.89e-07	AGR2
rs1580180	8	58474778	C	T	0.0603034	0.00807026	7.88e-14	AGR2
rs2020854	12	56349583	C	T	0.0916328	0.0149358	8.51e-10	AGR3
rs483082	19	44912921	T	G	0.0780843	0.00898957	3.75e-18	AGR3
rs12983058	19	51139527	T	G	-0.0578005	0.00811333	1.05e-12	AGR3
rs13435265	4	87225628	C	T	0.0439598	0.00889127	7.65e-07	AGR3
rs58198139	5	156972028	T	C	0.0788897	0.00795529	3.52e-23	AGR3
rs1404964	7	16851636	T	C	-0.0403734	0.00818058	8e-07	AGR3
rs17716502	8	115647504	T	C	-0.0607616	0.00950948	1.66e-10	AGR3
rs112875651	8	125494452	A	G	-0.0456788	0.00790905	7.67e-09	AGR3
rs61769724	1	928210	A	G	-0.0798544	0.0128309	4.86e-10	AGRN
rs13303278	1	986336	A	C	0.236812	0.00744995	1e-200	AGRN
rs881930	11	76773197	A	G	-0.085459	0.00950607	2.47e-19	AGRN
rs12790943	11	120187915	T	C	-0.0402518	0.0072193	2.47e-08	AGRN
rs7135337	12	120966352	C	A	-0.0441088	0.00725669	1.21e-09	AGRN
rs140509912	13	75632535	G	A	0.171928	0.0337474	3.5e-07	AGRN
rs2146822	13	94641320	C	T	-0.0434909	0.00801175	5.69e-08	AGRN
rs60136849	16	20342493	C	T	-0.0575895	0.00930275	5.99e-10	AGRN
rs56397647	19	19531986	T	C	0.0603592	0.0110962	5.34e-08	AGRN
rs907866	2	20171619	A	G	0.0426525	0.00718615	2.93e-09	AGRN
rs8668	20	62389008	G	A	0.120284	0.00784088	4.09e-53	AGRN
rs78804971	3	49784336	C	T	0.0958932	0.0129939	1.58e-13	AGRN
rs523118	3	136247046	G	T	0.0507059	0.00847883	2.23e-09	AGRN
rs13146355	4	76490987	A	G	0.0449363	0.00713259	2.97e-10	AGRN
rs13107325	4	102267552	T	C	0.0976289	0.0136463	8.41e-13	AGRN
rs62312434	4	116149119	T	G	-0.0448617	0.00873288	2.79e-07	AGRN
rs28947475	4	117542438	G	A	-0.150692	0.0284569	1.19e-07	AGRN
rs7654228	4	118378823	C	T	-0.086995	0.00732949	1.71e-32	AGRN
rs9266806	6	31410245	C	T	-0.0467362	0.0089827	1.96e-07	AGRN
rs10277115	7	1245559	T	A	0.0439543	0.00833057	1.32e-07	AGRN
rs4841133	8	9326154	G	A	-0.0863422	0.0123523	2.75e-12	AGRN
rs10971949	9	34146105	C	A	-0.037468	0.00757446	7.55e-07	AGRN
rs12239737	1	62620330	A	T	-0.0528468	0.00779704	1.22e-11	AGRP
rs2152318	1	179324376	T	C	0.0418508	0.00847303	7.84e-07	AGRP
rs55843942	1	214045988	G	C	0.0574948	0.0108132	1.05e-07	AGRP
rs964184	11	116778201	C	G	-0.147998	0.0107132	2.08e-43	AGRP
rs141469619	11	116843577	G	A	0.255137	0.0376899	1.29e-11	AGRP
rs3184504	12	111446804	C	T	-0.0443077	0.0072253	8.66e-10	AGRP
rs11626740	14	56213431	A	G	-0.0650053	0.0120162	6.31e-08	AGRP
rs35508038	16	7367954	T	C	-0.0706133	0.0144241	9.81e-07	AGRP
rs16957040	16	66825659	T	C	-0.147956	0.024699	2.09e-09	AGRP
rs28765128	16	67418776	T	C	0.0823002	0.0126587	7.95e-11	AGRP
rs77115810	16	67441899	A	G	-0.259008	0.0301088	7.81e-18	AGRP
rs77697917	17	43763481	T	C	0.120124	0.0215408	2.45e-08	AGRP
rs740516	17	69086821	G	C	-0.076553	0.0102961	1.04e-13	AGRP
rs483082	19	44912921	T	G	0.120897	0.00857481	3.85e-45	AGRP
rs5112	19	44927023	G	C	0.0550496	0.00779198	1.61e-12	AGRP
rs17695224	19	51820963	A	G	-0.0483385	0.00823735	4.41e-09	AGRP
rs7248028	19	55189474	C	T	0.0510692	0.00877916	5.99e-09	AGRP
rs1260326	2	27508073	C	T	-0.0525367	0.00744993	1.76e-12	AGRP
rs2594950	2	176643894	C	G	-0.0481234	0.00772013	4.56e-10	AGRP
rs6127099	20	54114863	T	A	-0.0409859	0.00830621	8.04e-07	AGRP
rs11134475	5	156972939	G	A	0.0434831	0.0075848	9.87e-09	AGRP
rs9271365	6	32619017	G	T	-0.0673303	0.00739545	8.68e-20	AGRP
rs28746878	6	32669738	C	G	-0.0834811	0.0137605	1.31e-09	AGRP
rs2239842	6	33294094	G	A	0.0412642	0.00766897	7.42e-08	AGRP
rs4646272	6	160130061	G	T	0.0881169	0.015393	1.04e-08	AGRP
rs56393506	6	160668275	T	C	0.0915272	0.00983878	1.37e-20	AGRP
rs6968170	7	73606346	A	G	-0.0472187	0.0080473	4.42e-09	AGRP
rs378974	8	9169129	T	C	-0.0411167	0.00796193	2.42e-07	AGRP
rs76722925	8	20073987	G	A	-0.111718	0.0131271	1.73e-17	AGRP
rs28809811	8	58562519	T	G	0.0393732	0.00797075	7.82e-07	AGRP
rs28601761	8	125487789	G	C	-0.0675996	0.00743335	9.54e-20	AGRP
rs7850767	9	124492244	T	C	0.0517089	0.00733478	1.79e-12	AGRP
rs10864726	1	230160406	T	C	-0.0663802	0.00767957	5.44e-18	AGT
rs78456011	1	230376136	C	T	0.129985	0.0262493	7.35e-07	AGT
rs115775968	1	230580239	G	A	-0.12732	0.0170853	9.19e-14	AGT
rs12410564	1	230670619	A	T	0.305437	0.0100857	1e-200	AGT
rs4028814	1	230886024	C	T	-0.0850052	0.00750195	9.21e-30	AGT
rs116414813	1	231175424	A	G	0.148525	0.0228819	8.53e-11	AGT
rs12989239	2	235450758	T	C	-0.234778	0.0477373	8.74e-07	AGT
rs62466318	7	73627755	T	C	-0.0847438	0.00879989	5.97e-22	AGT
rs1497406	1	16178825	G	A	0.0643298	0.00734835	2.05e-18	AGXT
rs4361977	1	155103603	T	C	-0.0631376	0.00733862	7.73e-18	AGXT
rs151068477	10	50882756	T	G	0.268628	0.0425536	2.74e-10	AGXT
rs10883451	10	100164661	C	T	-0.0510075	0.00724378	1.9e-12	AGXT
rs4084164	11	62433986	G	A	-0.0491249	0.00757294	8.76e-11	AGXT
rs2511241	11	73234296	T	C	-0.0912524	0.014229	1.43e-10	AGXT
rs17615729	13	27911817	T	C	0.054781	0.0109485	5.63e-07	AGXT
rs28929474	14	94378610	T	C	0.198458	0.0254679	6.57e-15	AGXT
rs7189522	16	80464197	C	T	-0.0428575	0.0081305	1.36e-07	AGXT
rs17138478	17	37713312	A	C	-0.0529776	0.0107573	8.44e-07	AGXT
rs4503880	18	58416822	C	T	-0.101532	0.00909701	6.33e-29	AGXT
rs73001065	19	19349732	C	G	0.0799716	0.0142357	1.94e-08	AGXT
rs11672697	19	33386049	T	C	-0.0475783	0.00727257	6.06e-11	AGXT
rs6859	19	44878777	G	A	0.0377833	0.0073553	2.79e-07	AGXT
rs10405357	19	54255803	C	T	-0.0567283	0.0073758	1.46e-14	AGXT
rs6708668	2	240667863	A	G	-0.0485899	0.00793189	9.02e-10	AGXT
rs5992932	22	17973488	T	C	-0.0425757	0.00847082	5e-07	AGXT
rs3747207	22	43928975	A	G	0.0802797	0.00881676	8.6e-20	AGXT
rs4835265	4	145900258	A	C	0.13035	0.0100047	8.38e-39	AGXT
rs6888304	5	31020414	G	A	-0.0535784	0.00812548	4.29e-11	AGXT
rs7730647	5	107292999	T	A	-0.0620186	0.0118132	1.52e-07	AGXT
rs17258904	6	21927900	G	A	-0.0417267	0.00811102	2.68e-07	AGXT
rs2745400	6	29520472	G	A	-0.0378609	0.00726688	1.89e-07	AGXT
rs2680912	7	66037331	T	C	-0.0388243	0.007671	4.17e-07	AGXT
rs75175378	7	77007226	A	G	0.0999686	0.018426	5.78e-08	AGXT
rs4148826	7	87445103	C	T	-0.04676	0.00952892	9.24e-07	AGXT
rs445	7	92779056	T	C	0.0607993	0.0123421	8.39e-07	AGXT
rs4841132	8	9326086	G	A	0.0638272	0.0125999	4.07e-07	AGXT
rs17516173	8	78980050	C	T	0.0412799	0.00745859	3.12e-08	AGXT
rs112875651	8	125494452	A	G	-0.0525684	0.00753356	3e-12	AGXT
rs4979373	9	114382224	T	C	-0.0429818	0.00734549	4.87e-09	AGXT
rs7924036	10	63431885	T	G	0.0417349	0.00728881	1.03e-08	AHCY
rs10876550	12	54318524	A	G	0.0472501	0.007372	1.46e-10	AHCY
rs7330042	13	113368711	T	A	0.0554194	0.0103089	7.62e-08	AHCY
rs17284653	2	207159721	A	G	-0.080503	0.0164132	9.35e-07	AHCY
rs147689947	20	33342667	A	G	-0.25147	0.0402482	4.16e-10	AHCY
rs143272538	20	34022238	T	C	-1.33701	0.0310903	1e-200	AHCY
rs78595810	3	46868322	T	G	-0.169764	0.0323293	1.51e-07	AHCY
rs1354034	3	56815721	C	T	0.047103	0.00745148	2.59e-10	AHCY
rs2470770	3	99002394	G	A	0.0364656	0.00737766	7.7e-07	AHCY
rs148594340	4	175228524	T	G	-0.254488	0.0512848	6.97e-07	AHCY
rs17269014	5	3686302	T	C	0.0475599	0.00930874	3.24e-07	AHCY
rs114694170	5	88884379	C	T	0.0789915	0.0155869	4.02e-07	AHCY
rs11950562	5	132316836	C	A	-0.0402529	0.00734505	4.25e-08	AHCY
rs6918629	6	23373986	A	G	-0.0376965	0.00766195	8.66e-07	AHCY
rs118079203	6	145901795	C	T	0.143339	0.0262879	4.96e-08	AHCY
rs17154155	7	80604927	T	G	0.0377309	0.00744031	3.95e-07	AHCY
rs342293	7	106731773	G	C	-0.0363726	0.00732765	6.91e-07	AHCY
rs333067	8	19150562	C	T	-0.0394298	0.00786555	5.36e-07	AHCY
rs2235922	1	17089967	A	G	-0.0383728	0.00760416	4.5e-07	AHNAK
rs12131794	1	219592884	A	C	0.0415284	0.00808389	2.79e-07	AHNAK
rs7080536	10	113588287	A	G	-0.119169	0.0183185	7.75e-11	AHNAK
rs74853209	11	62529129	C	T	-0.473173	0.0224177	6.84e-99	AHNAK
rs3017666	11	62636945	T	A	-0.0395715	0.0074983	1.31e-07	AHNAK
rs2289125	11	89491285	C	A	0.0553414	0.0090839	1.11e-09	AHNAK
rs4426179	12	18999407	A	G	0.0457755	0.00935352	9.88e-07	AHNAK
rs10149779	14	104784749	A	G	0.0428196	0.00817502	1.62e-07	AHNAK
rs908951	16	89631217	T	C	0.0427556	0.00750584	1.22e-08	AHNAK
rs6071100	20	60069940	C	T	-0.0383958	0.0075104	3.18e-07	AHNAK
rs436590	22	17810884	G	A	-0.037634	0.00767962	9.56e-07	AHNAK
rs154444	5	124421386	T	C	0.0416229	0.00762646	4.82e-08	AHNAK
rs543868	5	155221838	G	A	0.0384055	0.00770378	6.19e-07	AHNAK
rs113391103	8	96929288	T	C	-0.0905272	0.0183561	8.15e-07	AHNAK
rs12342201	9	93132682	A	G	-0.0415048	0.00740876	2.12e-08	AHNAK
rs78325172	10	102109876	T	C	-0.126238	0.025199	5.45e-07	AHNAK2
rs9805957	14	104970720	C	A	0.215521	0.00790973	1.78e-163	AHNAK2
rs11620866	14	105116589	G	C	-0.0879116	0.00885401	3.11e-23	AHNAK2
rs1260326	2	27508073	C	T	0.046194	0.007649	1.55e-09	AHNAK2
rs75378974	20	13254620	T	C	0.149673	0.0252201	2.94e-09	AHNAK2
rs13129434	4	143278273	A	G	-0.0370322	0.00749683	7.82e-07	AHNAK2
rs26515	5	96719133	T	C	0.0486684	0.00752392	9.9e-11	AHNAK2
rs7916868	10	63229171	T	A	0.0418389	0.00755541	3.07e-08	AHSA1
rs10884441	10	107219390	G	A	0.0548879	0.00963102	1.2e-08	AHSA1
rs6580980	12	54298277	G	A	0.0411093	0.00767203	8.4e-08	AHSA1
rs73183660	12	103093835	A	G	0.186352	0.0338872	3.82e-08	AHSA1
rs492411	18	45850225	A	C	0.054039	0.0109893	8.77e-07	AHSA1
rs7412	19	44908822	T	C	0.076918	0.0139397	3.43e-08	AHSA1
rs1354034	3	56815721	C	T	0.0499789	0.0077166	9.37e-11	AHSA1
rs35390303	3	149440986	C	G	0.129358	0.0257435	5.04e-07	AHSA1
rs6993770	8	105569300	T	A	-0.0428135	0.0083741	3.18e-07	AHSA1
rs141499155	1	19716809	T	C	0.119632	0.024175	7.48e-07	AHSG
rs2239222	14	72545177	G	A	-0.0397321	0.00689419	8.26e-09	AHSG
rs28929474	14	94378610	T	C	0.164478	0.0228645	6.31e-13	AHSG
rs67693285	16	30612658	G	T	0.0333603	0.00658223	4.02e-07	AHSG
rs11150188	16	79673401	G	A	0.0444719	0.00698614	1.94e-10	AHSG
rs1883711	20	40551182	C	G	0.114258	0.019237	2.86e-09	AHSG
rs9818254	3	13290475	T	C	-0.0867796	0.0173357	5.56e-07	AHSG
rs7640691	3	144602285	G	A	-0.0391086	0.00777857	4.96e-07	AHSG
rs11918665	3	186495995	G	A	0.351315	0.0110432	1e-200	AHSG
rs4686784	3	186516075	T	G	0.438829	0.00886466	1e-200	AHSG
rs61211338	3	186756732	C	G	0.158401	0.0125793	2.33e-36	AHSG
rs6444191	3	186981822	G	A	-0.0548927	0.0077105	1.09e-12	AHSG
rs59950280	4	3450618	A	G	0.0404112	0.00706085	1.04e-08	AHSG
rs35225200	4	102225731	C	A	-0.064282	0.0122238	1.45e-07	AHSG
rs12649972	4	148065910	T	C	-0.051316	0.00763237	1.77e-11	AHSG
rs4253252	4	186236304	G	T	0.032702	0.00655944	6.18e-07	AHSG
rs75719450	7	68851087	C	T	-0.0922432	0.0179252	2.66e-07	AHSG
rs157931	7	130897965	T	C	0.0369969	0.00710803	1.94e-07	AHSG
rs1611115	9	133635393	C	T	-0.0401254	0.00812054	7.76e-07	AHSG
rs12132194	1	205198200	G	A	-0.036211	0.00714217	3.98e-07	AHSP
rs3811444	1	247876149	T	C	0.0371949	0.00753952	8.08e-07	AHSP
rs17476364	10	69334748	C	T	0.0613069	0.011383	7.21e-08	AHSP
rs10742583	11	5227411	A	G	0.11724	0.0102264	1.99e-30	AHSP
rs79755767	12	54304624	A	G	0.0732209	0.0119943	1.03e-09	AHSP
rs8013143	14	23025068	G	A	-0.045306	0.00786376	8.34e-09	AHSP
rs57440738	14	79922668	A	G	-0.0617243	0.0117399	1.46e-07	AHSP
rs1203979	16	211867	A	T	-0.0591467	0.0077992	3.36e-14	AHSP
rs72790561	16	31526303	A	C	0.117633	0.0199204	3.52e-09	AHSP
rs7212367	17	28773777	A	G	0.0821489	0.00890902	2.95e-20	AHSP
rs114478645	17	76258412	G	A	0.201892	0.0324363	4.84e-10	AHSP
rs1000821	17	76437921	T	C	-0.111517	0.00709641	1.2e-55	AHSP
rs1992666	17	76496147	T	C	0.104291	0.0185653	1.94e-08	AHSP
rs5754387	22	21620414	C	G	-0.0824254	0.00894783	3.21e-20	AHSP
rs855791	22	37066896	G	A	0.0793626	0.00713906	1.04e-28	AHSP
rs11709525	3	49653063	T	C	-0.0440851	0.0078363	1.85e-08	AHSP
rs116532235	3	169855811	C	G	0.141181	0.0285616	7.69e-07	AHSP
rs2112362	5	115304992	A	C	0.0473634	0.00952631	6.63e-07	AHSP
rs35998524	5	154655677	T	C	0.0732968	0.0121544	1.63e-09	AHSP
rs875741	5	173860848	A	G	-0.0522353	0.00723127	5.07e-13	AHSP
rs1864924	5	174208260	C	T	-0.0373377	0.00741573	4.78e-07	AHSP
rs80215559	6	25917997	C	T	0.133237	0.0132845	1.13e-23	AHSP
rs3129981	6	30791080	T	C	-0.0552789	0.00950669	6.07e-09	AHSP
rs35786788	6	135097904	A	G	-0.0606348	0.00832083	3.17e-13	AHSP
rs590856	6	139523292	A	G	-0.0786139	0.00718348	7.12e-28	AHSP
rs6592965	7	50360284	A	G	-0.0665876	0.00713223	9.99e-21	AHSP
rs34416676	8	42598649	C	A	0.044989	0.00883879	3.58e-07	AHSP
rs151072881	10	122094712	C	T	-0.136762	0.0270787	4.41e-07	AIDA
rs969046	4	133203223	T	C	0.038585	0.007658	4.69e-07	AIDA
rs1611747	6	29864918	C	T	-0.0450359	0.0079232	1.32e-08	AIDA
rs607929	6	32619221	G	C	-0.072703	0.00779848	1.13e-20	AIDA
rs10876550	12	54318524	A	G	0.0442045	0.00765823	7.83e-09	AIF1
rs141006126	16	85490534	T	G	0.260439	0.0521177	5.82e-07	AIF1
rs62143194	19	53816370	G	C	0.0549133	0.00947882	6.9e-09	AIF1
rs189357788	3	159015043	G	T	-0.28262	0.0562172	4.97e-07	AIF1
rs2261033	6	31635814	G	A	-0.111464	0.00775419	7.46e-47	AIF1
rs6964794	7	14190686	T	A	0.0431334	0.00831047	2.1e-07	AIF1
rs342296	7	106732457	A	G	-0.0442294	0.00761794	6.4e-09	AIF1
rs6993770	8	105569300	T	A	-0.0505652	0.00840935	1.82e-09	AIF1
rs60757417	9	132989049	G	C	-0.0992981	0.0161448	7.73e-10	AIF1
rs16830188	1	24972350	T	C	0.143672	0.0259955	3.26e-08	AIF1L
rs11211477	1	47200337	A	G	0.0414871	0.00846457	9.52e-07	AIF1L
rs143621184	4	1533661	A	G	0.201726	0.0365582	3.43e-08	AIF1L
rs13327979	4	42899836	T	A	-0.0387482	0.00786399	8.34e-07	AIF1L
rs41268924	6	32167360	A	G	-0.0780367	0.0159225	9.53e-07	AIF1L
rs1414400	9	131046789	C	G	-0.268331	0.00842108	1e-200	AIF1L
rs4740402	9	131063586	A	G	-0.105352	0.00787498	8.13e-41	AIF1L
rs2884645	1	197333535	G	A	-0.0382676	0.00760927	4.93e-07	AIFM1
rs10733789	10	63188924	C	T	0.0402014	0.00819483	9.31e-07	AIFM1
rs6580980	12	54298277	G	A	0.0403107	0.00764066	1.32e-07	AIFM1
rs2007225	12	125328341	C	T	-0.0387959	0.00785151	7.76e-07	AIFM1
rs1077835	15	58431227	G	A	-0.0500107	0.00913146	4.33e-08	AIFM1
rs1532624	16	56971567	A	C	-0.0434793	0.00767254	1.45e-08	AIFM1
rs1671144	19	55011462	A	G	0.0383027	0.00766916	5.9e-07	AIFM1
rs1354034	3	56815721	C	T	0.0533844	0.00769434	3.97e-12	AIFM1
rs13128186	4	3964701	C	T	-0.135893	0.0274694	7.53e-07	AIFM1
rs274555	5	132387259	T	C	0.040849	0.00779017	1.57e-07	AIFM1
rs342293	7	106731773	G	C	-0.0500734	0.00755846	3.48e-11	AIFM1
rs73214686	8	19664845	G	A	-0.0624854	0.01231	3.85e-07	AIFM1
rs6993770	8	105569300	T	A	-0.0580863	0.00836007	3.7e-12	AIFM1
rs409801	9	4744743	C	T	0.0379561	0.00755684	5.09e-07	AIFM1
rs7529925	1	199038079	T	C	-0.0413891	0.00837344	7.7e-07	AK1
rs138250961	10	101558803	G	C	0.131718	0.0264661	6.46e-07	AK1
rs7313224	12	47233346	T	G	-0.0603389	0.0119757	4.69e-07	AK1
rs75362385	2	7432948	T	G	0.0928218	0.0160441	7.23e-09	AK1
rs1354034	3	56815721	C	T	0.04512	0.00742585	1.23e-09	AK1
rs75103498	3	101579134	C	T	-0.173741	0.0337769	2.69e-07	AK1
rs113900142	4	144049876	C	G	0.108827	0.0209547	2.06e-07	AK1
rs78979731	4	182676970	A	G	0.177699	0.0348353	3.38e-07	AK1
rs143515180	5	145480777	C	T	-0.139449	0.0284225	9.28e-07	AK1
rs116977475	9	127865473	T	C	0.098833	0.0189233	1.76e-07	AK1
rs143341770	1	33021172	C	T	-0.148745	0.0291532	3.36e-07	AK2
rs6580980	12	54298277	G	A	0.0461109	0.0076205	1.44e-09	AK2
rs12609736	19	55033916	G	A	0.052135	0.0101822	3.05e-07	AK2
rs6713635	2	196397689	A	G	-0.0442675	0.00815809	5.76e-08	AK2
rs1354034	3	56815721	C	T	0.0425398	0.00767522	2.98e-08	AK2
rs3804749	3	123114156	T	C	-0.041184	0.00776788	1.15e-07	AK2
rs11242109	5	132341354	T	G	-0.0433523	0.00755511	9.57e-09	AK2
rs9271344	6	32615551	C	T	-0.046619	0.00787713	3.25e-09	AK2
rs6993770	8	105569300	T	A	-0.0559709	0.00832586	1.79e-11	AK2
rs55646585	8	143925453	T	C	0.0409719	0.00763146	7.93e-08	AK2
rs388538	1	40357707	G	T	0.062237	0.0118573	1.53e-07	AKAP12
rs17488560	10	23766952	G	A	-0.0699433	0.013559	2.49e-07	AKAP12
rs4823502	22	47827608	G	A	0.0400494	0.00786445	3.53e-07	AKAP12
rs6897588	5	96667445	G	T	0.0561608	0.00946822	3e-09	AKAP12
rs116890881	6	98430435	A	G	0.151833	0.0308556	8.62e-07	AKAP12
rs1555104	6	151292905	C	T	-0.113963	0.0179964	2.41e-10	AKAP12
rs17655730	11	270715	C	T	0.0452246	0.00897666	4.7e-07	AKR1B1
rs72481564	14	105886393	T	C	0.0825889	0.0101679	4.57e-16	AKR1B1
rs185471025	14	105977024	C	T	0.12332	0.0219317	1.88e-08	AKR1B1
rs573377	17	29467463	C	T	-0.0391435	0.0076863	3.53e-07	AKR1B1
rs77850760	2	188460327	A	G	-0.0759171	0.0154609	9.1e-07	AKR1B1
rs4812825	20	44343322	T	C	-0.0575274	0.0112895	3.48e-07	AKR1B1
rs1354034	3	56815721	C	T	0.0418873	0.00779661	7.76e-08	AKR1B1
rs17622656	5	132485305	A	G	-0.0392654	0.00788247	6.31e-07	AKR1B1
rs117053018	6	92522798	A	G	-0.116654	0.023598	7.68e-07	AKR1B1
rs342293	7	106731773	G	C	-0.0392359	0.00767773	3.22e-07	AKR1B1
rs2229542	7	134450869	C	T	-0.586504	0.0333472	3.05e-69	AKR1B1
rs6993770	8	105569300	T	A	-0.067627	0.00847177	1.43e-15	AKR1B1
rs150552087	9	97890917	T	G	0.118162	0.0211857	2.44e-08	AKR1B1
rs2479083	1	15342737	G	A	-0.0389367	0.00791723	8.74e-07	AKR1B10
rs80239780	1	185777430	T	C	0.0729608	0.0146883	6.79e-07	AKR1B10
rs55843629	18	4059890	T	G	0.0556613	0.0112685	7.83e-07	AKR1B10
rs114766611	4	79070974	G	A	0.0738524	0.0149203	7.43e-07	AKR1B10
rs148597530	5	79349244	C	T	0.260958	0.0518458	4.82e-07	AKR1B10
rs71561196	6	10445344	A	G	-0.0648863	0.0131973	8.8e-07	AKR1B10
rs11253048	10	5219196	G	A	-0.068129	0.0101002	1.53e-11	AKR1C4
rs66516066	2	15112434	T	A	0.100836	0.0204884	8.58e-07	AKR1C4
rs181963496	1	19193766	T	C	0.11406	0.0224177	3.62e-07	AKR7L
rs59622577	1	19282519	T	C	-0.316627	0.012902	5.41e-133	AKR7L
rs12404783	1	19409391	C	A	0.0627152	0.00904695	4.14e-12	AKR7L
rs17047504	1	218203154	G	T	0.17749	0.0360492	8.5e-07	AKR7L
rs146483420	10	23519570	A	G	0.123276	0.024863	7.11e-07	AKR7L
rs34160075	14	105987878	A	G	-0.0737173	0.00836059	1.17e-18	AKR7L
rs3747207	22	43928975	A	G	0.075841	0.00915272	1.17e-16	AKR7L
rs9271567	6	32622679	T	C	0.0436782	0.00845477	2.39e-07	AKR7L
rs143635717	7	142121527	A	G	-0.165756	0.032969	4.97e-07	AKR7L
rs2954021	8	125469835	G	A	-0.0448773	0.0075585	2.9e-09	AKR7L
rs3754275	1	84401808	T	G	-0.0966559	0.0196304	8.49e-07	AKT1S1
rs10733789	10	63188924	C	T	0.0663639	0.00816233	4.27e-16	AKT1S1
rs10876550	12	54318524	A	G	0.0402631	0.00758423	1.1e-07	AKT1S1
rs10774624	12	111395984	A	G	-0.0405033	0.00755889	8.4e-08	AKT1S1
rs3786448	18	3745759	G	A	0.042913	0.0082491	1.97e-07	AKT1S1
rs892090	19	55027704	G	T	0.0540757	0.0101751	1.07e-07	AKT1S1
rs6756513	2	69945455	A	G	-0.0438485	0.00843339	2e-07	AKT1S1
rs1354034	3	56815721	C	T	0.0667144	0.00766777	3.3e-18	AKT1S1
rs17622656	5	132485305	A	G	-0.0395561	0.00773633	3.17e-07	AKT1S1
rs342298	7	106733200	T	C	-0.0558708	0.0075605	1.47e-13	AKT1S1
rs9314345	8	27233139	A	G	0.0443104	0.00902363	9.09e-07	AKT1S1
rs72676413	1	42306039	A	T	0.283112	0.0570668	7.01e-07	AKT2
rs75833561	1	158800522	C	T	-0.220103	0.0386548	1.24e-08	AKT2
rs148209736	1	173577514	C	T	0.132938	0.0266106	5.86e-07	AKT2
rs10822145	10	63174788	T	C	0.050786	0.00751623	1.41e-11	AKT2
rs6580980	12	54298277	G	A	0.040116	0.00759197	1.26e-07	AKT2
rs2149305	14	60958084	A	G	0.0401449	0.00809986	7.19e-07	AKT2
rs2088741	16	59652205	G	A	-0.0391547	0.0079983	9.81e-07	AKT2
rs8099942	19	55022110	G	C	0.0597261	0.00959355	4.8e-10	AKT2
rs1354034	3	56815721	C	T	0.0565366	0.00764478	1.41e-13	AKT2
rs3804749	3	123114156	T	C	-0.0405077	0.00773893	1.66e-07	AKT2
rs2706396	5	132461117	C	A	0.0555776	0.00760535	2.72e-13	AKT2
rs11759553	6	135101158	T	A	0.0428497	0.00843488	3.77e-07	AKT2
rs342298	7	106733200	T	C	-0.042229	0.00753146	2.06e-08	AKT2
rs6993770	8	105569300	T	A	-0.0684046	0.00829783	1.67e-16	AKT2
rs409801	9	4744743	C	T	0.0371736	0.00750439	7.29e-07	AKT2
rs4515770	1	243523611	C	T	0.0647252	0.00927641	3.01e-12	AKT3
rs7916868	10	63229171	T	A	0.0545975	0.00763222	8.46e-13	AKT3
rs10876550	12	54318524	A	G	0.0485208	0.00770685	3.06e-10	AKT3
rs58768321	2	37763645	G	A	0.0383742	0.00776898	7.84e-07	AKT3
rs242303	21	27471229	G	A	0.0399713	0.00806021	7.08e-07	AKT3
rs1354034	3	56815721	C	T	0.0451716	0.00778556	6.55e-09	AKT3
rs12187267	5	16490943	G	A	-0.0415358	0.0080567	2.53e-07	AKT3
rs11950562	5	132316836	C	A	-0.0419963	0.00767189	4.4e-08	AKT3
rs9265552	6	31330519	G	C	-0.0498302	0.00987168	4.47e-07	AKT3
rs409801	9	4744743	C	T	0.0392245	0.007644	2.88e-07	AKT3
rs6686289	1	65646084	A	T	0.0363268	0.00736593	8.15e-07	ALCAM
rs660240	1	109275216	C	T	-0.0424678	0.00835661	3.74e-07	ALCAM
rs61751619	1	151038849	T	C	0.0468036	0.00945545	7.42e-07	ALCAM
rs12412705	10	79076241	C	T	0.0712974	0.0142052	5.19e-07	ALCAM
rs146327621	11	82095644	A	G	0.134946	0.0266693	4.19e-07	ALCAM
rs113093057	11	111519589	A	G	-0.168218	0.0329263	3.24e-07	ALCAM
rs59822672	11	126401080	C	G	-0.0935746	0.0130269	6.81e-13	ALCAM
rs11045856	12	21197755	G	T	0.0777359	0.00806534	5.51e-22	ALCAM
rs904628	12	120904281	A	G	-0.058618	0.00685805	1.26e-17	ALCAM
rs28929474	14	94378610	T	C	0.1371	0.0240289	1.16e-08	ALCAM
rs72749772	15	62074814	C	T	0.13863	0.0255363	5.68e-08	ALCAM
rs12448760	16	16145682	A	G	0.0962073	0.00763153	1.94e-36	ALCAM
rs141552746	16	16227403	T	C	0.109513	0.0173553	2.79e-10	ALCAM
rs55714927	17	7176997	T	C	0.0846578	0.00867756	1.74e-22	ALCAM
rs79715480	17	7189533	C	G	-0.0584408	0.0117992	7.31e-07	ALCAM
rs77542162	17	69085137	G	A	0.150353	0.0229852	6.1e-11	ALCAM
rs7224668	17	81261988	C	T	-0.05055	0.00692408	2.86e-13	ALCAM
rs1137844	19	35852177	G	C	0.037279	0.00740942	4.87e-07	ALCAM
rs2638282	19	48710576	A	G	0.0592438	0.00692342	1.16e-17	ALCAM
rs10419198	19	49534760	T	C	0.0437582	0.00793232	3.46e-08	ALCAM
rs35107184	2	113076882	G	T	-0.0380363	0.00711106	8.85e-08	ALCAM
rs10929979	2	160358346	A	G	-0.0389253	0.0075652	2.67e-07	ALCAM
rs1858101	2	164880810	T	C	-0.0375976	0.00741833	4.02e-07	ALCAM
rs2294915	22	43945024	T	C	0.0778459	0.00811155	8.24e-22	ALCAM
rs114487521	3	105354234	T	G	0.264683	0.0243765	1.83e-27	ALCAM
rs7647426	3	105366146	G	C	0.1595	0.0207631	1.57e-14	ALCAM
rs183258379	3	105510233	T	G	-0.298584	0.038417	7.71e-15	ALCAM
rs34926152	3	105545332	T	G	-0.30284	0.0159911	5.54e-80	ALCAM
rs114734051	3	105615253	G	T	0.108277	0.0216214	5.5e-07	ALCAM
rs62275880	4	3468099	T	A	-0.0418772	0.00781701	8.45e-08	ALCAM
rs9274626	6	32668263	C	T	-0.0575998	0.00752348	1.92e-14	ALCAM
rs4841133	8	9326154	G	A	-0.110792	0.011893	1.21e-20	ALCAM
rs10901252	9	133252613	C	G	0.101506	0.0143045	1.28e-12	ALCAM
rs10883451	10	100164661	C	T	-0.040303	0.00713592	1.62e-08	ALDH1A1
rs10401969	19	19296909	C	T	0.0788466	0.0134779	4.91e-09	ALDH1A1
rs3747207	22	43928975	A	G	0.0742758	0.00870259	1.4e-17	ALDH1A1
rs56293029	6	135097901	A	C	-0.0979571	0.00831699	5.07e-32	ALDH1A1
rs181364947	9	72585254	A	C	-0.189454	0.0373318	3.88e-07	ALDH1A1
rs10119644	9	114367312	A	T	-0.0390852	0.00722086	6.2e-08	ALDH1A1
rs150015137	14	73787347	T	C	-0.204644	0.0406922	4.93e-07	ALDH2
rs11633920	15	77916434	A	G	0.0462951	0.00770443	1.87e-09	ALDH2
rs7241335	18	58463065	A	G	-0.0530968	0.0100192	1.16e-07	ALDH2
rs144079440	2	59553765	C	A	0.161783	0.0329942	9.42e-07	ALDH2
rs5766412	22	45094137	T	A	0.053813	0.010051	8.6e-08	ALDH2
rs6847076	4	145836888	A	G	0.0424256	0.00769322	3.49e-08	ALDH2
rs2472712	17	18994359	A	G	-0.0765103	0.00792784	4.88e-22	ALDH3A1
rs117587087	17	19720294	G	A	0.295902	0.0178725	1.44e-61	ALDH3A1
rs143651514	17	19969645	C	A	0.292688	0.0279341	1.09e-25	ALDH3A1
rs148662669	17	20172341	C	T	0.197563	0.0273441	5.01e-13	ALDH3A1
rs3747207	22	43928975	A	G	0.0487954	0.00833485	4.79e-09	ALDH3A1
rs62294337	3	169427204	T	A	0.0417011	0.00786047	1.13e-07	ALDH3A1
rs11170874	12	54332691	G	A	0.0437315	0.00813106	7.52e-08	ALDH5A1
rs9291436	4	22163551	C	T	-0.0422674	0.00792776	9.74e-08	ALDH5A1
rs4835265	4	145900258	A	C	0.0521343	0.0103829	5.14e-07	ALDH5A1
rs115456891	6	24436976	T	C	-0.237443	0.0365701	8.42e-11	ALDH5A1
rs2744581	6	24502256	G	A	-0.141489	0.00761857	5.45e-77	ALDH5A1
rs6993770	8	105569300	T	A	-0.0473661	0.00834972	1.41e-08	ALDH5A1
rs139646619	1	43730007	T	C	-0.217006	0.0397855	4.91e-08	ALMS1
rs182527081	14	105892992	G	T	0.068232	0.0124578	4.32e-08	ALMS1
rs4395575	4	110483723	G	A	0.120648	0.0239931	4.95e-07	ALMS1
rs1335277	6	4216698	C	T	-0.0396734	0.00792056	5.47e-07	ALMS1
rs11216930	11	118618067	C	A	-0.056499	0.00740229	2.3e-14	ALPI
rs55714927	17	7176997	T	C	0.0594997	0.00778432	2.11e-14	ALPI
rs78173576	17	7313780	G	T	0.0810386	0.0164201	8e-07	ALPI
rs7406910	17	48610894	C	T	0.0533877	0.0109049	9.79e-07	ALPI
rs79008529	19	5816942	A	G	0.119236	0.0168381	1.43e-12	ALPI
rs12460671	19	48434830	T	C	0.194816	0.0300229	8.65e-11	ALPI
rs147997219	19	48501660	T	C	-0.188472	0.0268063	2.05e-12	ALPI
rs35321803	19	48801796	T	C	-0.121509	0.0189636	1.48e-10	ALPI
rs2017135	19	48880012	T	C	0.0971209	0.0107964	2.35e-19	ALPI
rs4678	6	30926164	A	G	0.0369852	0.00745547	7.02e-07	ALPI
rs78756483	9	132794136	A	C	0.115677	0.0235109	8.65e-07	ALPI
rs146798134	9	132908052	G	A	-0.193654	0.0328715	3.83e-09	ALPI
rs7849542	9	133167143	A	G	-0.245046	0.00769095	1e-200	ALPI
rs28615587	9	133500024	G	T	0.161075	0.0076356	8.78e-99	ALPI
rs761164	1	39885979	G	A	0.0690221	0.00935198	1.58e-13	ALPP
rs11211376	1	46841976	T	C	-0.0500433	0.00972887	2.69e-07	ALPP
rs1278664	1	109350588	T	G	-0.0390773	0.00798308	9.83e-07	ALPP
rs147495909	1	229469018	A	G	-0.246574	0.0477245	2.38e-07	ALPP
rs7910180	10	13698360	G	A	0.0378241	0.00716231	1.28e-07	ALPP
rs35705950	11	1219991	T	G	0.0531059	0.0106519	6.18e-07	ALPP
rs1561709	11	13119599	A	G	-0.038066	0.00672237	1.49e-08	ALPP
rs6538677	12	95860750	G	A	0.0387713	0.0068531	1.54e-08	ALPP
rs7167092	15	31334670	C	T	-0.0521459	0.00701582	1.06e-13	ALPP
rs61661087	15	40428344	C	T	0.0362534	0.00669117	6.02e-08	ALPP
rs12907694	15	67930633	G	T	0.041982	0.00667741	3.23e-10	ALPP
rs55714927	17	7176997	T	C	0.0478053	0.00841867	1.36e-08	ALPP
rs77534576	17	49863303	T	C	0.107129	0.0201722	1.09e-07	ALPP
rs516246	19	48702915	T	C	-0.116778	0.0067206	1.25e-67	ALPP
rs13398149	2	231700171	C	A	0.103257	0.0104822	6.81e-23	ALPP
rs181168299	2	231708759	C	T	-0.259928	0.0322721	7.99e-16	ALPP
rs6721887	2	232291389	G	T	-0.382245	0.0122552	1e-200	ALPP
rs188431683	2	232366620	T	C	0.109045	0.0217586	5.4e-07	ALPP
rs12478529	2	232421944	T	C	0.505569	0.00873697	1e-200	ALPP
rs12329760	21	41480570	T	C	-0.0435289	0.00795909	4.52e-08	ALPP
rs10433602	3	39708498	A	T	0.0559563	0.0110933	4.56e-07	ALPP
rs149958055	3	41827329	T	C	-0.0475238	0.00944839	4.91e-07	ALPP
rs17282579	3	138010025	A	G	-0.047199	0.00670988	2e-12	ALPP
rs13072136	3	149674311	G	A	0.0452572	0.00864433	1.65e-07	ALPP
rs59951351	4	38150469	T	A	-0.0901261	0.0146504	7.66e-10	ALPP
rs813139	4	144937321	G	A	0.0406482	0.00672959	1.54e-09	ALPP
rs2076295	6	7562999	G	T	0.0455906	0.0067228	1.19e-11	ALPP
rs9265640	6	31332337	G	A	-0.0439729	0.00681072	1.07e-10	ALPP
rs55792059	6	53487408	A	C	0.0753169	0.00880205	1.16e-17	ALPP
rs117847945	6	79152613	G	A	0.174993	0.0244144	7.63e-13	ALPP
rs4236709	8	32552592	A	G	0.0520442	0.00802145	8.69e-11	ALPP
rs3936578	9	106719746	C	A	-0.0795677	0.00675347	4.85e-32	ALPP
rs120858	9	133333974	A	G	-0.0451865	0.00676174	2.35e-11	ALPP
rs12327040	18	44870043	C	G	0.059221	0.0120185	8.33e-07	AMBN
rs73039701	19	44285445	T	A	0.115683	0.0235875	9.37e-07	AMBN
rs138570933	3	98295814	T	C	-0.227629	0.0448567	3.88e-07	AMBN
rs4694051	4	70341681	C	T	-0.0395326	0.00781943	4.29e-07	AMBN
rs1490481	4	70395591	T	C	0.0769408	0.00857311	2.84e-19	AMBN
rs4837495	9	117688487	C	T	0.0412412	0.00837116	8.37e-07	AMBN
rs6426679	1	21378585	A	G	0.0547557	0.0108354	4.34e-07	AMBP
rs12136556	1	79157090	T	G	0.0653758	0.0122	8.38e-08	AMBP
rs61747728	1	179557079	T	C	0.148779	0.0184205	6.65e-16	AMBP
rs564699	11	89467705	T	C	-0.0376923	0.0070935	1.07e-07	AMBP
rs1169294	12	120988791	A	G	0.0576477	0.00767545	5.88e-14	AMBP
rs28929474	14	94378610	T	C	0.179747	0.0248192	4.41e-13	AMBP
rs34262842	16	20344489	G	A	-0.0644207	0.00955298	1.55e-11	AMBP
rs423135	16	89674465	A	G	0.0412358	0.00711748	6.89e-09	AMBP
rs704	17	28367840	A	G	-0.109447	0.00708723	8.43e-54	AMBP
rs75166367	2	162107791	A	G	-0.101998	0.0148971	7.55e-12	AMBP
rs76601653	3	56895933	C	T	0.0642915	0.0126832	4e-07	AMBP
rs1265065	6	31109947	C	T	0.17247	0.028587	1.61e-09	AMBP
rs12524441	6	32056457	A	G	-0.21803	0.0280771	8.14e-15	AMBP
rs77237405	7	27708630	A	G	-0.133089	0.0268152	6.93e-07	AMBP
rs10265221	7	151717243	C	T	0.0534909	0.00779477	6.77e-12	AMBP
rs72759050	9	114058047	A	T	-0.214171	0.0219302	1.58e-22	AMBP
rs141738059	9	114069727	C	T	0.41237	0.0320336	6.38e-38	AMBP
rs3762058	9	114080053	T	C	0.116696	0.0166572	2.46e-12	AMBP
rs113974644	9	114331793	C	T	-0.055772	0.00826728	1.52e-11	AMBP
rs76043534	12	62055154	G	C	-0.0724047	0.0138418	1.69e-07	AMDHD2
rs73162240	22	25219213	G	C	0.0821607	0.0164162	5.59e-07	AMDHD2
rs3763342	6	33011220	T	C	0.0612076	0.0114912	1e-07	AMDHD2
rs185187973	8	74961750	A	T	-0.455094	0.0910938	5.86e-07	AMDHD2
rs147072954	14	34581960	T	C	0.0772169	0.0157106	8.88e-07	AMFR
rs13330457	16	56423421	T	A	-0.0513435	0.00896611	1.03e-08	AMFR
rs141851824	19	35805516	T	C	0.215133	0.0422313	3.5e-07	AMFR
rs2570972	1	109509517	G	A	0.0458459	0.00779674	4.1e-09	AMIGO1
rs9564380	13	67193281	C	T	0.0601067	0.0111445	6.91e-08	AMIGO1
rs2394946	6	31253376	A	G	-0.0399466	0.00786038	3.73e-07	AMIGO1
rs3791101	1	43900578	A	G	0.0607892	0.00804123	4.04e-14	AMIGO2
rs660611	1	210252164	A	G	-0.0378118	0.00745002	3.87e-07	AMIGO2
rs56278466	10	17833858	G	T	0.0481323	0.00778673	6.36e-10	AMIGO2
rs189034378	10	45709581	C	G	-0.0526692	0.00872303	1.56e-09	AMIGO2
rs7096909	10	80524756	T	A	0.0582542	0.00911764	1.67e-10	AMIGO2
rs603424	10	100315722	A	G	-0.0506542	0.0099065	3.17e-07	AMIGO2
rs2572940	11	9703290	T	C	-0.101719	0.0206542	8.44e-07	AMIGO2
rs174546	11	61802358	T	C	0.0631463	0.0077648	4.21e-16	AMIGO2
rs4055121	11	126362442	T	C	-0.11801	0.0108893	2.29e-27	AMIGO2
rs10748461	12	47110312	G	A	-0.0711758	0.0128049	2.72e-08	AMIGO2
rs4768144	12	47215275	C	T	0.11646	0.0081965	8.11e-46	AMIGO2
rs215384	12	47366418	G	C	0.157371	0.00763887	2.67e-94	AMIGO2
rs2238144	12	47745568	T	C	0.0564654	0.00945294	2.32e-09	AMIGO2
rs7137749	12	56704256	C	T	0.0520141	0.0077871	2.4e-11	AMIGO2
rs10774625	12	111472415	G	A	-0.0829079	0.00745304	9.58e-29	AMIGO2
rs4899172	14	65313186	C	T	0.0568149	0.00938059	1.39e-09	AMIGO2
rs72698720	14	100712378	G	C	-0.0607865	0.0108387	2.04e-08	AMIGO2
rs682619	15	58806574	C	T	0.052288	0.00773121	1.35e-11	AMIGO2
rs56093546	17	7160496	A	T	0.108047	0.00927697	2.38e-31	AMIGO2
rs2586539	17	7191771	G	C	-0.0581753	0.0106406	4.57e-08	AMIGO2
rs77542162	17	69085137	G	A	0.165957	0.0246977	1.82e-11	AMIGO2
rs8064597	17	81294762	G	A	-0.0463888	0.00752237	6.97e-10	AMIGO2
rs4987767	18	63237319	C	T	-0.16713	0.0326491	3.07e-07	AMIGO2
rs73044067	19	35183590	A	C	-0.0456076	0.00911443	5.62e-07	AMIGO2
rs602662	19	48703728	A	G	0.0398499	0.00745701	9.09e-08	AMIGO2
rs1524668	2	9557243	C	A	0.061741	0.00784469	3.53e-15	AMIGO2
rs7269864	20	49480071	C	T	-0.0600905	0.00948213	2.34e-10	AMIGO2
rs4820378	22	39473204	T	C	0.0454366	0.00753544	1.64e-09	AMIGO2
rs1354034	3	56815721	C	T	-0.146488	0.00758697	4.62e-83	AMIGO2
rs10935473	3	98698056	T	G	-0.177712	0.00752507	2.64e-123	AMIGO2
rs422497	3	155834105	G	A	0.0502846	0.00859744	4.95e-09	AMIGO2
rs2736100	5	1286401	A	C	-0.0457169	0.00742715	7.49e-10	AMIGO2
rs1281937	6	32610366	C	T	-0.062095	0.00832232	8.57e-14	AMIGO2
rs6920211	6	135110180	C	T	0.0493661	0.00853916	7.42e-09	AMIGO2
rs342275	7	106718770	T	C	-0.0409393	0.00740188	3.19e-08	AMIGO2
rs4841133	8	9326154	G	A	-0.0780362	0.0127936	1.06e-09	AMIGO2
rs385893	9	4763176	C	T	0.0606439	0.00742894	3.26e-16	AMIGO2
rs10967975	9	27541452	A	T	0.0436595	0.00876872	6.39e-07	AMIGO2
rs4341217	9	93077795	G	A	0.0467937	0.00937618	6.02e-07	AMIGO2
rs12740374	1	109274968	T	G	0.0695177	0.00841527	1.45e-16	AMN
rs45619139	10	16898847	G	C	0.0635731	0.0116827	5.28e-08	AMN
rs7979473	12	120982457	G	A	0.0509377	0.0072562	2.22e-12	AMN
rs1190603	14	102119787	A	G	-0.153406	0.0127437	2.25e-33	AMN
rs3742443	14	102504699	A	G	0.0449827	0.00796578	1.63e-08	AMN
rs12893481	14	102782617	T	C	0.266944	0.00805338	1e-200	AMN
rs7157813	14	102997224	A	G	-0.228482	0.00785581	5.64e-186	AMN
rs115035469	14	103053461	G	A	0.321863	0.0160325	1.2e-89	AMN
rs8018979	14	103642750	A	G	0.0762051	0.00794373	8.55e-22	AMN
rs4788460	16	72120610	T	C	0.0391968	0.00767798	3.31e-07	AMN
rs1801689	17	66214462	C	A	0.2378	0.0205476	5.64e-31	AMN
rs7659445	4	87279782	A	G	-0.0357092	0.00701968	3.64e-07	AMN
rs11756492	6	108743054	G	A	-0.0400092	0.00783887	3.33e-07	AMN
rs4846913	1	230158968	A	C	0.0485048	0.00718227	1.44e-11	AMOT
rs142805717	11	94947727	T	C	-0.159586	0.0289308	3.47e-08	AMOT
rs2393791	12	120986153	T	C	0.0883226	0.00723777	3e-34	AMOT
rs340005	15	60585831	A	G	0.0494881	0.00722229	7.28e-12	AMOT
rs7239714	18	74278020	A	G	0.0390629	0.00761717	2.92e-07	AMOT
rs34255979	19	45881572	T	C	-0.0639555	0.0108575	3.85e-09	AMOT
rs114109762	20	4487681	T	A	0.167967	0.0307842	4.86e-08	AMOT
rs8135300	22	43441926	T	C	-0.0716914	0.0146155	9.33e-07	AMOT
rs10027182	4	148060255	A	G	-0.0629264	0.00804607	5.25e-15	AMOT
rs1882	6	31415134	G	A	0.0342235	0.00693002	7.87e-07	AMOT
rs2065396	6	160068712	C	G	0.0400748	0.00749416	8.92e-08	AMOT
rs2954021	8	125469835	G	A	0.0542179	0.00701812	1.11e-14	AMOT
rs141624000	16	4963591	A	C	-0.113402	0.0218781	2.18e-07	AMOTL2
rs2609957	2	30649401	C	G	-0.0607804	0.0120606	4.66e-07	AMOTL2
rs79809575	2	55887947	T	C	-0.120438	0.0233077	2.37e-07	AMOTL2
rs1353778	3	134369601	T	A	0.0610168	0.00781582	5.86e-15	AMOTL2
rs114694170	5	88884379	C	T	-0.0855912	0.0161103	1.08e-07	AMOTL2
rs3780420	9	97914884	C	T	0.0580264	0.00787843	1.77e-13	AMOTL2
rs61891766	11	10318532	A	G	-0.257948	0.0303531	1.92e-17	AMPD3
rs79057673	11	10456722	C	G	-0.37818	0.0257316	6.73e-49	AMPD3
rs117302185	11	10459632	C	A	-0.608213	0.024072	7.48e-141	AMPD3
rs75317269	11	10525176	T	C	0.119626	0.0217047	3.56e-08	AMPD3
rs4916613	4	3751859	T	C	0.0948817	0.0181556	1.73e-07	AMPD3
rs11759553	6	135101158	T	A	-0.0494252	0.00807001	9.09e-10	AMPD3
rs36213864	8	32553591	A	G	0.157903	0.0313197	4.62e-07	AMPD3
rs78583187	1	101943638	G	A	-0.0838757	0.0101543	1.46e-16	AMY1A
rs76533014	1	102873302	C	T	0.203487	0.0251095	5.32e-16	AMY1A
rs72688875	1	103235216	T	C	0.213183	0.0112528	4.86e-80	AMY1A
rs72692398	1	103481378	T	C	-0.330104	0.00901658	1e-200	AMY1A
rs72985866	1	104046315	A	G	0.285603	0.0461407	6.02e-10	AMY1A
rs1932471	1	104131536	A	C	-0.161752	0.00795834	7.75e-92	AMY1A
rs150780816	1	104602898	T	C	-0.193151	0.0297397	8.32e-11	AMY1A
rs150816167	1	179602727	C	T	0.0971955	0.0197507	8.61e-07	AMY1A
rs291091	1	206940334	C	T	0.0650349	0.0078316	1.01e-16	AMY1A
rs56278466	10	17833858	G	T	0.0510126	0.00754994	1.41e-11	AMY1A
rs10832956	11	18624121	C	T	0.0446638	0.00819019	4.94e-08	AMY1A
rs7118388	11	34432600	G	A	-0.0354211	0.00719591	8.55e-07	AMY1A
rs174548	11	61803876	G	C	0.0436484	0.00771772	1.55e-08	AMY1A
rs3851583	12	10936756	G	A	-0.093753	0.00823027	4.62e-30	AMY1A
rs3984946	12	11281324	C	T	-0.0632331	0.00944995	2.21e-11	AMY1A
rs848119	14	36773933	T	G	-0.0752672	0.00911132	1.45e-16	AMY1A
rs7166788	15	58549537	G	C	-0.0367031	0.00720217	3.47e-07	AMY1A
rs30404	16	79587160	A	C	0.0575655	0.0114996	5.56e-07	AMY1A
rs533406	16	88908452	G	A	-0.0492626	0.00736176	2.21e-11	AMY1A
rs2638282	19	48710576	A	G	0.0724581	0.00724784	1.57e-23	AMY1A
rs11899808	2	65495026	A	T	0.0505352	0.00921898	4.21e-08	AMY1A
rs13159800	5	44325367	C	T	-0.0727222	0.00763835	1.72e-21	AMY1A
rs55901622	6	126836293	G	A	0.041789	0.00806156	2.17e-07	AMY1A
rs4723992	7	40938554	G	A	-0.039018	0.00737255	1.21e-07	AMY1A
rs2410530	8	17201060	A	T	-0.0383893	0.00784211	9.82e-07	AMY1A
rs78583187	1	101943638	G	A	-0.0838757	0.0101543	1.46e-16	AMY1B
rs76533014	1	102873302	C	T	0.203487	0.0251095	5.32e-16	AMY1B
rs72688875	1	103235216	T	C	0.213183	0.0112528	4.86e-80	AMY1B
rs72692398	1	103481378	T	C	-0.330104	0.00901658	1e-200	AMY1B
rs72985866	1	104046315	A	G	0.285603	0.0461407	6.02e-10	AMY1B
rs1932471	1	104131536	A	C	-0.161752	0.00795834	7.75e-92	AMY1B
rs150780816	1	104602898	T	C	-0.193151	0.0297397	8.32e-11	AMY1B
rs150816167	1	179602727	C	T	0.0971955	0.0197507	8.61e-07	AMY1B
rs291091	1	206940334	C	T	0.0650349	0.0078316	1.01e-16	AMY1B
rs56278466	10	17833858	G	T	0.0510126	0.00754994	1.41e-11	AMY1B
rs10832956	11	18624121	C	T	0.0446638	0.00819019	4.94e-08	AMY1B
rs7118388	11	34432600	G	A	-0.0354211	0.00719591	8.55e-07	AMY1B
rs174548	11	61803876	G	C	0.0436484	0.00771772	1.55e-08	AMY1B
rs3851583	12	10936756	G	A	-0.093753	0.00823027	4.62e-30	AMY1B
rs3984946	12	11281324	C	T	-0.0632331	0.00944995	2.21e-11	AMY1B
rs848119	14	36773933	T	G	-0.0752672	0.00911132	1.45e-16	AMY1B
rs7166788	15	58549537	G	C	-0.0367031	0.00720217	3.47e-07	AMY1B
rs30404	16	79587160	A	C	0.0575655	0.0114996	5.56e-07	AMY1B
rs533406	16	88908452	G	A	-0.0492626	0.00736176	2.21e-11	AMY1B
rs2638282	19	48710576	A	G	0.0724581	0.00724784	1.57e-23	AMY1B
rs11899808	2	65495026	A	T	0.0505352	0.00921898	4.21e-08	AMY1B
rs13159800	5	44325367	C	T	-0.0727222	0.00763835	1.72e-21	AMY1B
rs55901622	6	126836293	G	A	0.041789	0.00806156	2.17e-07	AMY1B
rs4723992	7	40938554	G	A	-0.039018	0.00737255	1.21e-07	AMY1B
rs2410530	8	17201060	A	T	-0.0383893	0.00784211	9.82e-07	AMY1B
rs78583187	1	101943638	G	A	-0.0838757	0.0101543	1.46e-16	AMY1C
rs76533014	1	102873302	C	T	0.203487	0.0251095	5.32e-16	AMY1C
rs72688875	1	103235216	T	C	0.213183	0.0112528	4.86e-80	AMY1C
rs72692398	1	103481378	T	C	-0.330104	0.00901658	1e-200	AMY1C
rs72985866	1	104046315	A	G	0.285603	0.0461407	6.02e-10	AMY1C
rs1932471	1	104131536	A	C	-0.161752	0.00795834	7.75e-92	AMY1C
rs150780816	1	104602898	T	C	-0.193151	0.0297397	8.32e-11	AMY1C
rs150816167	1	179602727	C	T	0.0971955	0.0197507	8.61e-07	AMY1C
rs291091	1	206940334	C	T	0.0650349	0.0078316	1.01e-16	AMY1C
rs56278466	10	17833858	G	T	0.0510126	0.00754994	1.41e-11	AMY1C
rs10832956	11	18624121	C	T	0.0446638	0.00819019	4.94e-08	AMY1C
rs7118388	11	34432600	G	A	-0.0354211	0.00719591	8.55e-07	AMY1C
rs174548	11	61803876	G	C	0.0436484	0.00771772	1.55e-08	AMY1C
rs3851583	12	10936756	G	A	-0.093753	0.00823027	4.62e-30	AMY1C
rs3984946	12	11281324	C	T	-0.0632331	0.00944995	2.21e-11	AMY1C
rs848119	14	36773933	T	G	-0.0752672	0.00911132	1.45e-16	AMY1C
rs7166788	15	58549537	G	C	-0.0367031	0.00720217	3.47e-07	AMY1C
rs30404	16	79587160	A	C	0.0575655	0.0114996	5.56e-07	AMY1C
rs533406	16	88908452	G	A	-0.0492626	0.00736176	2.21e-11	AMY1C
rs2638282	19	48710576	A	G	0.0724581	0.00724784	1.57e-23	AMY1C
rs11899808	2	65495026	A	T	0.0505352	0.00921898	4.21e-08	AMY1C
rs13159800	5	44325367	C	T	-0.0727222	0.00763835	1.72e-21	AMY1C
rs55901622	6	126836293	G	A	0.041789	0.00806156	2.17e-07	AMY1C
rs4723992	7	40938554	G	A	-0.039018	0.00737255	1.21e-07	AMY1C
rs2410530	8	17201060	A	T	-0.0383893	0.00784211	9.82e-07	AMY1C
[truncated: 48,475 more rows]
